# Event-based vision sensor enables fast and dense single-molecule localization microscopy

Clément Cabriel<sup>1,\*</sup>, Christian G. Specht<sup>2</sup>, and Ignacio Izeddin<sup>1,\*\*</sup>

<sup>1</sup>Institut Langevin, ESPCI Paris, Université PSL, CNRS, 75005 Paris, France

<sup>2</sup>DHNS, Inserm U1195, Université Paris-Saclay, 94276 Le Kremlin-Bicêtre, France

\*Corresponding author: [clement.cabriel@espci.fr](mailto:clement.cabriel@espci.fr), [cabriel.clement@gmail.com](mailto:cabriel.clement@gmail.com)

\*\*Corresponding author: [ignacio.izeddin@espci.fr](mailto:ignacio.izeddin@espci.fr)

July 22, 2022

Single-molecule localization microscopy (SMLM) applications are often hampered by the fixed frame rate at which data acquisition is performed. Here, we present an alternative new approach of acquiring and processing SMLM data based on an event-based (or neuromorphic vision) sensor. This type of sensor reacts to light intensity changes rather than integrating the number of photons during each frame exposure time. This makes them particularly suited to SMLM, where the ability to surpass the diffraction-limited resolution is provided by blinking events. Each pixel works independently and returns a signal only when an intensity change is detected; intensity changes are returned as a list with pixel positions and timestamps rather than frames with a fixed frame rate. Since the output is a sparse list containing only useful data (for example a molecule turning on or off), the temporal resolution is significantly faster than typical speeds of EMCCD and sCMOS cameras. Here we demonstrate the feasibility of SMLM super-resolution imaging with this type of event-based sensors which, in addition, are more affordable than EMCCD or sCMOS cameras. We characterize the localization precision and show that it is equivalent to that of frame-based scientific cameras, including on fluorescently labelled biological samples. Furthermore, taking advantage of the unique properties of the sensor, we use event-based SMLM to perform very dense single-molecule acquisitions, where frame-based cameras experience significant limitations. All the data processing codes are made available.

## Introduction

The advent of single-molecule localization microscopy (SMLM) fifteen years ago brought an improvement in image resolution in fluorescence microscopy by a factor of 10 [1, 2, 3] and has become an invaluable tool for cell biology as it can resolve cellular structures with nanometer resolution. Since then, significant advancements have been possible through the development of new optical techniques, e.g. achieving sub-nanometric localization [4, 5], ingenious labeling methods [6, 7, 8] or the synthesis of brighter dyes compatible with live-cell imaging [9, 10], not to mention numerous application-specific or more general data treatment methods [11, 12, 13]. These advances address some of the remaining challenges in SMLM, including but not limited to imaging thick samples and tissues, reducing phototoxicity and photobleaching for live-cell imaging, but also obtaining quantitative information on the distribution, size, shape, spatial organisation and stoichiometry of macromolecular complexes in order to steer biological interpretation. For a recent review of the field of SMLM, refer to [14, 15]

While retrieving the positions of single molecules is pivotal in applications as varied as 3D imaging of immunolabelled samples [16, 17, 18, 19], spatial analysis of protein clusters [20, 21] or protein

42 dynamics in the cell [22], single-molecule microscopy is also used in a much broader range of ap-  
43 plications exploiting other information carried by the point-spread function (PSF). A non exhaustive  
44 list of them includes accessing the spectrum of the dyes for multicolor imaging [23, 24], retrieving  
45 the emitter's orientation via polarization measurements [25], or even probing the local environment  
46 of the molecules through modifications of the fluorescence intensity [26, 27], or the fluorescent state  
47 lifetime [28, 29, 30, 31].

48  
49 Regardless of their use, single-molecule experiments are routinely limited by the acquisition speed  
50 to a certain extent. On the one hand, SMLM experiments routinely require more than 20000 frames,  
51 which represents tens of minutes of acquisition with exposure times in the 10 ms–50 ms range. On  
52 the other hand, the chosen exposure time sets a hard limit on the temporal scale at which fast dy-  
53 namic processes are observable. While the importance of temporal resolution is obvious in live cells,  
54 where it determines the range of dynamic processes that can be studied, it cannot be overlooked in  
55 experiments with fixed samples—(d)STORM buffers suffer from oxidation with time, long experi-  
56 ments require proper 3D stability of the sample etc. More generally, improving the acquisition rate  
57 allows more efficient data collection, which can be important to better describe biological phenomena  
58 and improve statistical significance. In some cases, it can even be used to develop automated high  
59 throughput data collection setups and analysis workflows [32, 33].

60  
61 Improving the data recording rate, however, is no small task, as frame-based scientific cameras (EM-  
62 CCD and sCMOS) work at a fixed frame rate chosen before the acquisition. Even assuming that the  
63 camera is able to work at the desired speed without any significant dead time between frames or  
64 unreasonable cropping of the camera chip, this imposes a compromise between the temporal band-  
65 width and the quality of the signal (shorter exposure leads to higher relative noise). Besides, it also  
66 raises serious issues whenever the spatial distribution of proteins in the sample is heterogeneous, or  
67 when different targets in the experiment obey dynamic processes at different time scales. This can  
68 be the case in Single Particle Tracking (SPT) studies if the protein of interest undergoes large varia-  
69 tions of diffusivity in time and/or space over the course of the acquisition, or in the case of structural  
70 imaging of fixed samples, when the use of an excitation with a Gaussian profile causes the center and  
71 the edges of the region of interest to blink at different rates. In any case, the frame rate typically has  
72 to be adapted to the fastest processes or the highest densities, which leads to a detrimental increase  
73 of noise.

74  
75 On the other hand, event-based sensors (also sometimes called neuromorphic or dynamic vision sen-  
76 sors) use a very different principle than frame-based cameras. An event-based sensor is an array of  
77 pixels that each function independently of the others, and are sensitive to intensity changes rather  
78 than to an average irradiance over a fixed exposure time. Although each pixel has a response time  
79 (in the range of a few  $\mu\text{s}$  to a few hundreds of  $\mu\text{s}$ ), it does not work at a fixed frame rate. Instead, it  
80 returns a signal called 'event' after it detects a change of irradiance. Therefore, only meaningful data  
81 is recorded (as long as a pixel does not detect a change, it does not return any output signal), which  
82 potentially allows a vast increase of data collection rate compared to scientific cameras, as the maxi-  
83 mum data transfer rate is almost never a limiting factor in event-based sensors. As a comparison, the  
84 fraction of camera-recorded data effectively used for localization purposes varies from around 5 to  
85 10 % in the case of a (direct) Stochastic Optical Reconstruction Microscopy ((d)STORM) experiment  
86 with very dense Point Spread Functions (PSFs) in each frame, to less than 0.1 % in sparse SPT experi-  
87 ments, taking into account that the localization program calculates the position from a small Region  
88 Of Interest (ROI) around the center of the PSF and discards the rest of the data. Event-based sensors  
89 are relatively new on the market but typically target industrial applications rather than bioimaging.  
90 They typically have pixel numbers of the order of a million, and a pixel size of the order of 10  $\mu\text{m}$ ,  
91 making them quite straightforward to include in a typical fluorescence microscopy setup. Finally  
92 they are generally more affordable than sCMOS and EMCCD cameras.

93  
94 Here, we propose an implementation of single-molecule localization experiments with an event-

95 based sensor, which, to the best of our knowledge, has never been reported before. Incidentally, we  
96 are not aware of any reported use of event-based sensors in fluorescence microscopy or in cell biology.  
97 We will describe the principle of event-based sensing in more detail and the data processing steps.  
98 We then characterize the response of the sensor to a fluorescent signal and assess the localization pre-  
99 cision. We furthermore demonstrate the detection of organic dyes for single-molecule fluorescence  
100 imaging and use it to produce a super-resolution image of a fixed immunolabelled sample. Finally,  
101 we use the unique features of event-based sensing to improve localization performance in the case  
102 where the density of molecules is high and PSF overlaps cause frame-based algorithms to fail.

## 103 Principle, optical setup and data display

104 An event-based sensors is a rectangular or square array of pixels that are sensitive to optical intensity  
105 variations only. For a technological review about event-based sensing, readers may refer to [34]. Since  
106 each pixel works independently of the rest of the array, the principle of the sensor can be described  
107 through the response of one pixel. At each time  $t$ , the light intensity  $I(t)$  (i.e. number of photons in-  
108 coming on the pixel per unit time) is linearly converted into an electronic response. The pixel stores  
109 a reference level  $I_{\text{ref}}(t)$ , which is then used to detect meaningful variations of the intensity relative to  
110 this reference level. Two thresholds  $B_+$  and  $B_-$  are used to set the sensitivity and can be modified.  
111 They are used respectively to detect an increase and decrease in intensity. While  $B_+$  and  $B_-$  can be  
112 set to different values (all pixels use the same values of  $B_+$  and  $B_-$ , which are set as input parame-  
113 ters but can be modified during the acquisition if required), we always use equal values (called  $B$ ) in  
114 this work and therefore symmetric positive and negative detections. According to the specifications  
115 given by the manufacturer, the intensity variation detection is logarithmic rather than linear. There-  
116 fore, a signal is triggered as soon as  $\log(I(t)/I_{\text{ref}}(t)) > B_+$  (positive event) or  $\log(I(t)/I_{\text{ref}}(t)) < B_-$   
117 (negative event). The principle of the response of a pixel is illustrated in **Fig. 1a**, and we show in  
118 **Fig. 1b** how varying the values of the sensitivity  $B$  changes the output signal. From a quantitative  
119 point of view, these thresholds can be as low as 30 % of the reference level. Whenever an event is  
120 triggered, the sensor returns a signal containing the  $x$  and  $y$  pixel coordinates, the polarity (positive  
121 or negative) and the time of the trigger. These coordinates are added to the output file. After the  
122 event is triggered, the value of the reference level is replaced with the value of the intensity at the  
123 time of the trigger. As a consequence, a large variation of the signal will cause the pixel to return  
124 several events in a quick succession, which readily provides a certain *quantitativity* in the detection.

125  
126 When compared to scientific cameras (whether EMCCD or sCMOS), the event-based sensor behaves  
127 differently on several points. First, it detects only intensity changes (in our case, a molecule turning  
128 on or off, or the motion of a moving emitter). As long as the intensity stays close to the reference  
129 level within the tolerance threshold, the pixel does not respond. This offers very promising per-  
130 spectives when it comes to implementing live data processing and image reconstruction, or even  
131 high-throughput automated experiments, where the volume of data is sometimes so high that the  
132 raw data has to be discarded. Another difference between scientific cameras and event-based sen-  
133 sors is the dynamic range, which is vastly superior for the event-based sensor, making it almost  
134 impossible to saturate the sensor with fluorescence signals, which can become problematic when us-  
135 ing bright fiducial markers. In other words, large contrasts (which can be limiting especially in the  
136 case of EMCCD cameras where saturation can occur for moderate signals) are rarely a problem with  
137 event-based sensors. However, the most significant difference between the two types of detectors is  
138 probably the fact that the event-based sensor does not use a fixed frame rate and thus does not return  
139 a limited number of frames. This implies that the temporal resolution of the acquisition is not limited  
140 by user-defined parameters. While the temporal bandwidth is not infinite (each pixel has a certain  
141 response time in the range of a few  $\mu\text{s}$  to a few hundreds of  $\mu\text{s}$  [35]), the time resolution is usually  
142 determined in the processing stage by the time base used for the data treatment. This feature is very  
143 interesting for SMLM imaging since it allows to process the same dataset with different time bases  
144 to investigate biological processes at different time scales. The differences between the responses of  
145 a scientific camera and an event-based sensor are summarized in **Fig. 1c**. A further difference is the

146 quantitativity of the signal: scientific cameras are more adapted for quantitative intensity measure-  
147 ments provided the exposure time is properly matched to the biological or photochemical processes  
148 of interest. Nevertheless, as we will further investigate in this paper, the event-based sensor still  
149 provides some quantitative information which lies in the number of events generated by an intensity  
150 transition—a dim or a bright molecule produce different numbers of events when they turn on or off.  
151 This is further controllable by tuning the sensitivity threshold  $B$ , as illustrated in **Fig. 1b**.

152  
153 We used such an event-based sensor in an optical setup designed for SMLM experiments presented  
154 in **Fig. 1d**. It is essentially a standard wide-field microscope with a high numerical aperture collec-  
155 tion. The detection path is built to offer some modularity by distributing the fluorescence light in  
156 either one or both of the sensors, the EMCCD and the event-based sensor—this will be useful later  
157 in the characterization and comparison of their relative performance. With regards to data display  
158 and processing, several approaches are conceptually possible, and we propose two complementary  
159 displays. A purely frame-based approach is proposed in **Fig. 1e**. Frames are generated by binning all  
160 the events in a certain time interval  $\Delta t$  in a pixelized canvas, respecting also the sign of events (each  
161 positive event is counted as +1 and each negative as -1). This visualization method emphasizes the  
162 spatial distribution of events at the expense of some time resolution. In **Fig. 1e**, we represent data  
163 acquired on 200 nm fluorescent beads deposited on a coverslip and excited with a square pulsed ex-  
164 citation with a duty cycle of 50 % at 10 Hz and a frame reconstruction at  $\Delta t = 10$  ms. The rising and  
165 falling edges of  $I(t)$  are clearly visible, as well as the near absence of output signal when the inten-  
166 sity is constant, whether the source is emitting or not. Note the sharp signal at frames 10 ms–20 ms  
167 and 60 ms–70 ms, when the excitation turns on and off respectively. On the contrary, no signal is  
168 returned between 30 ms and 60 ms, when the bead is emitting light with a constant power. Finally,  
169 one can note on frames 20 ms–30 ms and 70 ms–80 ms that the signal is not returned instantly—more  
170 specifically, the dimmer pixels at the edge of the PSF respond more slowly which explains the visible  
171 rings (we attribute this to the time necessary to sample the photons into an intensity measurement).  
172 **Fig. 1e** furthermore highlights the quantitative aspect of the detection—the bead at the bottom left is  
173 less bright and thus generates fewer events. This frame-based display has the advantages of clarity,  
174 as it is very similar to the familiar frames acquired by scientific cameras, and spatial information  
175 conservation (the PSFs can be seen to be spread on several pixels like on camera frames). Although  
176 the time bin can easily be varied in post-processing to change the time scale, we find that for certain  
177 applications, it is poorly suited to accurately investigate the time response of the imaging system  
178 and/or of the biological sample studied. From a conceptual point of view, representing essentially  
179 sparse data with a dense matrix is also somewhat unadapted. Therefore, we propose in **Fig. 1f** an  
180 complementary data display based on temporal profiles (i.e. time traces of the number of detected  
181 events) over all the pixels of a PSF, which we find adequately highlights the nature of the signal  
182 returned by the event-based sensor. Although this representation also relies on time binning, it is  
183 typically done with much lower values of  $\Delta t$ , which is more suited for the study of the time response  
184 of single molecules. This comes at the cost of a certain loss of spatial information, as all the pixels  
185 in a PSF are summed together. **Fig. 1f** incidentally reveals two unexpected features—first, there is a  
186 slight imbalance between the numbers of total positive and negative events in one cycle, and second  
187 the negative events seem on average slower than the positive events. We do not have an explana-  
188 tion for this effect, but we assume it can easily be addressed by tuning the electronics coupled to the  
189 event-based sensor. For the sake of simplicity and easy implementation for this work, we decided to  
190 use the sensor out-of-the box, without further modifications.

191  
192 Although the temporal bandwidth is not defined by the acquisition parameters, the processing algo-  
193 rithms have to be carefully designed to account for the time scales that match the desired biological  
194 application. We highlight this in **Fig. 1g** by displaying the signal returned by 40 nm fluorescent  
195 beads deposited on a coverslip illuminated with a continuous excitation during the translation of  
196 the sample using the piezo stage. A small time bin ( $\Delta t = 1$  ms) efficiently samples the dynamic to  
197 reveal two opposed lobes—a positive leading edge and a negative trailing edge. This comes at the  
198 cost of a relatively modest number of events. On the contrary, increasing the time bin to  $\Delta t = 10$  ms

199 provides a large number of events for a better statistical set, which is spoiled by a dramatic motion  
200 blur as well as a loss of resolution. Obviously, the value of the time bin has to be matched to the  
201 phenomenon under investigation, but no knowledge or assumption is required prior to the acqui-  
202 sition (contrary to scientific camera-based approaches), as the selection of  $\Delta t$  is done as part of the  
203 processing workflow. This could even be used to perform a multi-timescale processing (either using  
204 a single multiscale workflow or running several single-scale algorithms with different time bases) on  
205 the same dataset to extract both slow and fast processes. It is interesting to notice that the use of an  
206 event-based sensor readily provides an efficient way to manage the molecule density by performing  
207 a spatio-temporal resampling, as we will highlight more in detail in the section **Event-based high**  
208 **density imaging**.

## 209 Single molecule localization

210 We then set out to use the event-based detection microscope to detect and localize single molecules,  
211 focusing on blinking fluorophores such as in (d)STORM or PALM microscopy. Our processing ap-  
212 proach to single-molecule localization is partly frame-based. Events from the raw output list are  
213 binned into frames with a given  $\Delta t$  (typically between 10 ms and 50 ms), which are used for PSF  
214 detection. This step is done on the positive events only (i.e. when the molecule turns on) using a  
215 wavelet decomposition algorithm described in [11]. Then, each molecule is localized using a subset  
216 of events corresponding to a spatial ROI of  $\pm 4$  pixels (i.e. a total area of  $9 \times 9$  pixels = 600 nm) around  
217 the center of the PSF, and a temporal ROI of  $[T_0 - \delta T_{\text{start}}, T_0 + \delta T_{\text{end}}]$  around the timestamp of the  
218 frame  $T_0$ , with the (negative) lower boundary  $\delta T_{\text{start}}$  around 20 ms to 60 ms, and the upper boundary  
219  $\delta T_{\text{end}}$  around 80 ms to 200 ms ( $\delta T_{\text{end}}$  has to be sufficient to cover the full ON time of the molecule). In  
220 this subset of events, the  $x$  and  $y$  positions are determined by calculating the center of mass of all the  
221 events. Moreover, complementary information can also be extracted, such as the number of positive  
222 and negative events  $N_+$  and  $N_-$ , the time when the molecule turns on  $t_+$  (taken as the mean of the  
223 times of the positive events) and the time when it turns off (mean of the times of the negative events)  
224 and the ON time, defined as  $t_{\text{ON}} = t_- - t_+$ . Finally, the drift is corrected using a direct cross corre-  
225 lation algorithm (in other words, the reference is the sample image itself rather than fiducial markers).

226  
227 As a first step, we aimed at assessing the localization precision. To this end, we used a regime where  
228 both a classical scientific camera and an event-based sensor return a signal that can be used for lo-  
229 calization precision measurement. We deposited fluorescent beads on a coverslip in PBS, and we  
230 illuminated them with a square-modulated laser at 10 Hz. A 30:70 (EMCCD:event-based sensor)  
231 beamsplitter was used in the detection path. The exposure time of the EMCCD was set to 100 ms  
232 (i.e. one period exactly), thus yielding a constant signal on which the localization precision could be  
233 measured from many frames. The sensitivity of the event-based sensor was set to different arbitrary  
234 values, and the output signal was binned in 100 ms frames on which both positive and negative  
235 events were summed regardless of their sign. Localization precision was also assessed from the re-  
236 peated measurement of the center of the PSF. Center of mass calculation was used in both cases.  
237 The principle of this measurement is summarized in **Fig. 2a** and the precision results are displayed  
238 in **Fig. 2b**, along with the Cramér-Rao Lower Bound (CRLB) values for the experimental conditions  
239 used with the EMCCD camera. Note that the beads detected on the EMCCD exhibit lower number  
240 of photons per cycle on average due to the use of a 30:70 beamsplitter in the detection path. Overall,  
241 the event-based sensor precision was found to be on par with the EMCCD center of mass calculation,  
242 or slightly better. In particular, precisions below 10 nm are found in the typical levels of signals of  
243 SMLM fluorophores, and sub-5 nm precision is obtained with approximately 5000 photons, which is  
244 the level of signal emitted by many far red organic dyes such as Alexa Fluor (AF) 647. Precision tends  
245 to improve slightly with finer sensitivity values. Interestingly, experimental precision was found to  
246 be slightly better than the EMCCD CRLB, which we attribute to a very low level of background-  
247 induced events and read noise when working with an event-based sensor.

248  
249 We furthermore characterized the linearity of the response, which is an important aspect for the quan-

250 titativity of the output data. We used the same acquisition and processing as described in **Fig. 2a**, and  
251 we displayed the number of output events per period as a function of the number of incoming pho-  
252 tons per period in **Fig. 2c**. As expected, the number of events recorded for a given input signal  
253 increases as the sensitivity gets finer (i.e. from low to high sensitivity). Interestingly, the relationship  
254 between the output and the input was found to be largely linear for all sensitivity levels investigated,  
255 and over a large range of input signal values (unlike the specifications given by the manufacturer).  
256 Only the data points above 20000 photons per period seem to deviate from the linear regime, but  
257 a signal at that level exceeds the typical conditions of SMLM acquisitions. We hypothesize that the  
258 output becomes more strongly logarithmic at higher levels of input signal, as this particular sensor  
259 has been originally designed to work at ambient light levels.

260  
261 To further illustrate the capability of such a sensor for SMLM, we reconstructed and displayed the  
262 PSF obtained over one period in **Fig. 2d** for an input signal of 10000 photons and an integrated output  
263 signal of 1000 events approximately (with a high sensitivity). The PSF displays a very usual shape  
264 (as could be expected due to the linearity of the response with the input optical signal characterized  
265 previously), and a profile plots yields a width around  $w=190$  nm (standard deviation), slightly above  
266 EMCCD values ( $w=170$  nm, data not displayed).

267  
268 After the characterization of the system with fluorescent beads, we set out to use the event-based sen-  
269 sor to detect single molecules, focusing on organic dyes typically used for dSTORM. We deposited  
270 AF647 dyes on a coverslip, immersed them in dSTORM buffer and illuminated them with typical  
271 dSTORM laser power density (see **Methods** section) to induce blinking. Acquisitions were per-  
272 formed with the event-based sensor, and frames reconstructed at  $\Delta t=10$  ms are displayed in **Fig. 2e**.  
273 The blinking can be efficiently monitored—molecules exhibit a typical positive rising edge, followed  
274 by a few tens of ms without any signal, and finally a negative falling edge at the same position as the  
275 rising edge (similar to the output of beads with a square modulation displayed in **Fig. 1e**). Much like  
276 on beads, all the events in a localization regardless of their sign can be summed to reconstruct a PSF,  
277 as shown in **Fig. 2f**. Again, the PSF displays a very similar aspect to camera-based PSFs.

278  
279 We also investigated the temporal behaviour of the fluorophore blinking, which is readily returned  
280 by the sensor output. This is displayed as positive and negative profiles in **Fig. 2g**. While some dyes  
281 have a very clear profile with well-defined rising and falling edges (the falling edge still displaying  
282 the trail mentioned previously) and few events in between, others display a very erratic behaviour,  
283 with a succession of multiple rising and falling edges, and seemingly intermediate levels of gray. This  
284 is consistent with the blinking regime observed on an sCMOS camera under the same illumination  
285 conditions and with an exposure time of 10 ms (data not displayed). Organic dyes under oxygen re-  
286 duction buffers are known to have more complex photophysical behaviour than fluorescent proteins  
287 used for PALM or dyes used for DNA-PAINT, where the emission of the labels is closer to a clean  
288 square signal. We point out that, interestingly, event-based SMLM could provide an efficient way to  
289 both characterize these temporal emission fluctuations and image the dyes without any performance  
290 or information loss.

## 291 **Event-based SMLM bioimaging**

292 As organic dyes could be efficiently detected with our event-based single-molecule localization  
293 method, we then moved on to imaging fixed biological samples labelled with AF647. We prepared  
294 COS-7 cells and labelled the  $\alpha$ -tubulin with AF647 (see **Methods** section). A dSTORM imaging buffer  
295 was used and the sample was illuminated with a laser beam at typical dSTORM power density (see  
296 **Methods**). Using a 50:50 beamsplitter in the detection path, we performed a simultaneous EMCCD  
297 and event-based acquisition.

298  
299 2D SMLM images obtained with the event-based and the EMCCD sensors were found to be very sim-

300 ilar at the scale of the whole field of view of  $21 \times 21 \mu\text{m}^2$  (**Fig. 3a**), with the event-based localization  
301 image even yielding slightly more homogeneous localization densities over the field of view, espe-  
302 cially in dense regions. At the nanometer length scale (**Fig. 3b**), the event-based detection performed  
303 on par or even outperformed the EMCCD, allowing to resolve the hollow core of the microtubules  
304 (see the cyan arrows and the corresponding profiles in **Fig. 3c**). Note that taking into account the  
305 diameter of the microtubules (30 nm) and the size of the antibody labelling (10 nm on each side),  
306 the apparent diameter is expected to be around 50 nm (see [8, 18] for more information). While both  
307 the event-based center of mass detection and the EMCCD Gaussian fitting reveal the apparent hol-  
308 lowness of the microtubules, a simple center of mass calculation with the EMCCD fails to do so. We  
309 furthermore performed resolution assessments using the now well established Fourier Ring Corre-  
310 lation (FRC) method [36] through the NanoJ-SQUIRREL Fiji plugin [37] (see **Methods** section). The  
311 results presented in **Supplementary Fig. 1** show an event-based resolution of 36 nm with a center of  
312 mass calculation and 30 nm with Gaussian fitting, very close to the reliable Gaussian fitting EMCCD  
313 resolution (28 nm), and significantly better than a simple center of mass calculation on the EMCCD  
314 data (50 nm). All the resolution measurements are summarized in **Supplementary Table. 1**. While  
315 using a dual-view detection setup is useful to monitor the acquisition in real time and to compare  
316 the final results, it is not necessary and it reduces the number of collected photons. To exploit the  
317 full potential of the event-based sensor, we performed an acquisition using a mirror in place of the  
318 beamsplitter cube, whose result is displayed in **Fig. 3d**. There again, the event-based SMLM ensures  
319 consistent localization performance over the whole ROI, and yields excellent precision that allows to  
320 resolve the microtubules apparent hollow core even more clearly, as shown on the profiles in **Fig. 3e**.

321  
322 Our results so far clearly demonstrate the feasibility of SMLM bioimaging with an event-based vision  
323 sensor, which is able to perform on par with a conventional and more costly EMCCD camera due to  
324 its virtually non-existent reading noise. Moreover, while very useful for classical SMLM imaging,  
325 our event-based method gives us access to supplementary information other than the position of de-  
326 tected molecules. To illustrate this, we used event-based sensing to extract photophysical properties  
327 of the fluorophores, namely the ON time (as defined in the section **Principle, optical setup and data**  
328 **display** as well as in **Fig. 2g**) and the total number of events counted in each localization—which  
329 increases approximately linearly with the total number of photons emitted by the molecule, as men-  
330 tioned previously.

331  
332 **Fig. 3f** displays super-resolved maps of the ON time and number of events detected for each molecule.  
333 The Gaussian shape of the illumination profile is clearly visible, and, as expected, both follow an in-  
334 verse evolution—high ON times corresponds to molecules that are excited with low power, and  
335 therefore emit low numbers of photons (hence low numbers of events). A more quantitative assess-  
336 ment of this is provided in **Fig. 3g**, where both histograms are displayed in two different regions. In  
337 this acquisition, the ON time and the number of events only reveal the Gaussian shape of the illu-  
338 mination beam, but these quantities are often used in the literature to highlight chemical affinities  
339 or near-field optical effects at the molecular scale. One can cite for example the use of engineered  
340 DNA-PAINT strands and labels to perform high-specificity multi-species demixing (using the bind-  
341 ing time and frequency, as well as the intensities collected in three different color channels) [38]. Ex-  
342 amples of the use of the ON time and intensities in single-molecule nanophotonics include probing  
343 the changes in photophysical properties that fluorescent molecules undergo near a plasmonic gold  
344 surface or in a nanometric volume where the excitation field is vastly enhanced [39, 26]. One inter-  
345 esting use of event-based SMLM could be demixing of simultaneous multicolor blinking sequences,  
346 assigning each molecule a color based on its ON time or photophysical behaviour without the need  
347 for adapting the acquisition to resolve such variations. Such a demixing could be done either using  
348 user-defined criteria or through a deep learning algorithm.

349

## 350 Event-based high density imaging

351 In order to exploit the unique capabilities of event-based sensors for single-molecule imaging, we use  
352 it in a regime where the density of PSFs is very high and their overlap significantly compromises the  
353 localization performance of frame-based acquisitions. The density of the PSFs in each frame results  
354 from the combination of several factors, in particular the density of the protein of interest, the density  
355 of the fluorescent labels and the blinking behaviour of the molecules. This can happen in particular  
356 in dSTORM experiments, where the density of molecules is usually difficult to control. Still, this is a  
357 more general problem, even when working with PALM or DNA-PAINT labels that allow more flex-  
358 ible control of the density of active PSFs. Indeed, independently of the labelling strategy, the most  
359 common approach when using frame-based cameras is to adapt the density of active fluorophores to  
360 the most dense structures in the field of view to have sparse PSFs in those regions. This, however,  
361 implies that the acquisition duration has to be increased to properly sample the less dense structures.  
362 However, in some cases such as acquisitions in living samples, this may not even be possible, result-  
363 ing in under-sampled structures. Very few techniques are available to tackle such situations. While  
364 SOFI [40, 41] yields consistent performance over a large range of molecule densities, it is not intrin-  
365 sically a single-molecule approach, therefore it is not very well suited for quantitative applications  
366 such as molecule counting measurements. Other single-molecule approaches to process dense PSFs  
367 may require cumbersome procedures of deconvolution [42] or deep learning algorithms [43].

368  
369 We propose to take advantage of the spatio-temporal resampling capabilities of the event-based sen-  
370 sors to perform high density imaging. From a conceptual point of view, one can consider the case  
371 where the blinking dynamic is low but the density of molecules sufficiently high to induce significant  
372 overlap—for example in a PALM experiment where the excitation power is low but the photoactiva-  
373 tion rate high. In such situations where regular frame-based acquisitions would fail no matter what  
374 frame rate is chosen, the event-based sensor, on the contrary, would be able to detect (and localize)  
375 a molecule that becomes fluorescent or photobleaches among many others that maintain a constant  
376 level of emission. The same reasoning stands for dSTORM experiments where the switching rate  
377 is too low (when the excitation power is not sufficient for example) or simply where the density of  
378 labels is too high (such as at the beginning of the pumping phase, which is often discarded, leading  
379 to a loss of time and data).

380  
381 To illustrate this principle, we performed acquisitions where a very dense layer of 488-nm-excitable  
382 fluorescent beads is deposited on a coverslip, alongside a few, sparse 647-nm-excitable fluorescent  
383 beads. We used a multiband filter to excite and collect both wavelength channels, and we excited  
384 with a continuous 488 nm laser and a square-modulated 638 nm laser at 10 Hz. The 488 nm beads  
385 thus mimic dense static background with overlapping PSFs, and the 647 nm beads imitate the effect  
386 of a few molecules turning on or off on that background. Again, we used a 50:50 beamsplitter cube in  
387 the detection path to compare the performance of both imaging modalities. The results presented in  
388 **Fig. 4a** yield EMCCD frames where most 647 nm beads cannot be localized with usual approaches. In  
389 contrast, the event-based reconstructed frames contain almost no trace of the static background, and  
390 reveal very clearly the modulated beads even in the cases where they are not visible to the naked eye  
391 in the EMCCD frame. Note in particular that, while beads 1 and 2 are clearly visible on the EMCCD  
392 image, beads 3 and 4 would be more challenging to localize due to the overlapping neighbouring  
393 PSFs. Finally, beads 5 and 6 are almost impossible to localize with standard processing algorithms.  
394 All of them are clearly visible and localizable on the event-based image.

395  
396 Having validated the principle with such a first simple experiment, we moved on to real blink-  
397 ing acquisitions on biological samples. We therefore imaged a fixed COS-7 cell labelled with anti-  
398  $\alpha$ -tubulin primary and AF647-conjugated secondary antibody as in the section **Event-based high**  
399 **density imaging** and in **Fig. 3**, which we excited with a relatively high power density in a standard  
400 dSTORM buffer. However, instead of waiting for the end of the pumping phase, when the molecule  
401 density starts to become sparse, we started the acquisition at the same time as the excitation. Further-  
402 more, we chose a region where the microtubules are closely interwoven and the PSF density is thus



403 high. Using again a 50:50 beamsplitter cube, we compared the performance of an EMCCD-based  
404 and the event-based SMLM methods over the course of a short 250 s acquisition (during which the  
405 density of PSFs remains high).

406  
407 The event-based processing code was adapted to resample the data on shorter time scales. More  
408 specifically, frames were generated from either the positive events only with a time bin of  $\Delta t=10$  ms,  
409 and the localization was subsequently performed on the corresponding positive-only events within  
410 a short time range  $[T_0 - 30 \text{ ms}, T_0 + 30 \text{ ms}]$  centered around the frame timestamp. By running the  
411 processing on such a fine time scale, we expect to extract only the moment when a molecule turns on  
412 while its neighbours maintain a roughly constant level of emission. Then, a similar processing was  
413 performed to extract the moment when the molecules turn off. Even though this loses track of the  
414 link between the rising edge and the falling edge for each molecule and thus prevents the extraction  
415 of the ON time, it does retain the quantitative aspect of the measurement (each rising edge generates  
416 one positive localization, and each falling edge generates one negative localization), so molecules  
417 could still be counted. On the other hand, the EMCCD acquisition was carried out with a 30 ms  
418 exposure time and processed with a standard algorithm. It should be noted here that the exposure  
419 time is below the typical ON times of the dyes, which implies that the density of PSFs per frame is  
420 not very sensitive to the exposure time, and is on the contrary mostly determined by the density of  
421 the target protein, the density of labelling as well as the global fraction of active dyes (in other words  
422 the pumping rate and elapsed pumping time).

423  
424 **Supplementary Fig. 2** shows both an ROI of an EMCCD frame, where the PSFs are found to be dense  
425 enough to overlap, and an event-based generated frame of the positive only events in a  $\Delta t=10$  ms time  
426 bin. On that frame (used only for the PSF detection), the density of molecules seems vastly reduced  
427 compared to the EMCCD frame, which means that although many neighbouring molecules are in an  
428 ON state, the variations of the signal are sparse enough to be spotted individually. The last frame  
429 shows all the positive events in the  $[T_0 - 30 \text{ ms}, T_0 + 30 \text{ ms}]$  range around the frame, revealing levels  
430 of signal and noise a priori sufficient to allow localization.

431  
432 Running the localization workflow on the whole 250 s long event-based dataset produced a strikingly  
433 well-sampled 2D SMLM image (**Fig. 4b**). As expected, the image exhibits a very uniform resolution,  
434 with little loss of sampling density or resolution either in dense areas or at the edges of the field of  
435 view. A more detailed view is presented in **Fig. 4c**, which reveals overall very satisfactory resolution  
436 performance. While the resolution is not as good as in the optimal case presented in **Fig. 3d** (the ap-  
437 parent hollow core of the microtubules is not visible here), it is very satisfactory given the suboptimal  
438 acquisition conditions—50 % of the photons only, 4 minutes of acquisitions compared to usual times  
439 around 20–30 minutes in dSTORM experiments, high density of PSFs and each localization contain-  
440 ing only the positive or only the negative events (leading to an immediate  $\sqrt{2}$  loss in resolution).

441  
442 Overall, we consider that given these challenging imaging and processing conditions, the event-  
443 based SMLM performs very well both with center of mass calculation (**Fig. 4c** left) and Gaussian  
444 fitting (super-resolved image not displayed), as the tubulin filaments are well resolved and do not  
445 exhibit significant undersampling. This is even more striking when the results are compared to those  
446 obtained over the same area with a standard processing from the EMCCD acquisitions. **Fig. 4c** shows  
447 an undersampled 2D SMLM image with a Gaussian fitting EMCCD-based processing that does not  
448 allow to properly distinguish a certain number of tubulin filaments, especially in dense areas. A  
449 more basic center of mass algorithm run from the EMCCD frames yielded even more catastrophic  
450 results, with resolutions hardly better than the diffraction limit in dense areas. A quantitative assess-  
451 ment of the image resolution using FRC is provided in **Supplementary Table. 1** and in **Fig. 4d**. The  
452 resolution was found to be 64 nm for event-based SMLM (both for center of mass calculation and  
453 Gaussian fitting), compared with 92 nm and 136 nm for EMCCD-based SMLM with Gaussian fitting  
454 and center of mass calculation, respectively. The resolution maps presented in **Fig. 4d** highlight not  
455 only the better overall performance of event-based SMLM, but also the reliability of the resolution,

456 which is much more uniform than with EMCCD acquisitions.

457

458 These results provide a convincing proof of principle of how the spatio-temporal resampling prop-  
459 erties inherent in event-based SMLM can be used to improve localization performance compared to  
460 classic scientific cameras without resorting to complex processing workflows. The performance could  
461 be further enhanced by refining the processing pipeline. In particular, we believe that it would be  
462 possible to assess the local (in space and in time) density of molecules to adapt the processing condi-  
463 tions. For example, the time base and the PSF localization area could be relatively large in areas with  
464 low density to allow detection of both the rising edge and the falling edge, while denser areas could  
465 be processed with the high density algorithm, associated with a fine time base and dissociation of the  
466 positive and negative events. We expect such a more subtle type of algorithm to improve both the  
467 processing time and the localization performance, and potentially the quantitativity at the same time.  
468 This is conceptually reminiscent of previous works such as [44], where the size of the spatial range  
469 available for PSF shaping is adapted in real time according to the density of molecules (which varies  
470 in time during the acquisition), or [33], where the acquisition speed is adapted in real time so that it  
471 allows, recording of data at a sufficient rate while saving storage and processing power. Neverthe-  
472 less, a fundamental advantage of event-based SMLM is that the sensor records data as fast as it can,  
473 which means that no prior knowledge about the acquisition behaviour is needed, and that workflow  
474 refinements are inherently processing-based. Another advantage is that, while the exposure time of  
475 cameras can be varied in time, all the chip is constrained with the same exposure time—by contrast,  
476 all event-based processing parameters can be varied along spatial dimensions as well.

477

## 478 Discussion

479 With this work, we have demonstrated, for the first time to our knowledge, the use of novel neuro-  
480 morphic vision sensors for SMLM super-resolution fluorescence imaging. Besides its more affordable  
481 price than conventional EMCCD or sCMOS scientific cameras, the unique characteristics of event-  
482 based sensors make them perfectly suited for detecting sparse events in space and time, incidentally  
483 the working principle of SMLM. With our event-based SMLM approach, we have obtained dSTORM  
484 super-resolution images of the  $\alpha$ -tubulin cytoskeleton network of COS-7 cells labeled with AF647  
485 with a spatial resolution on par with the state-of-the-art approach using an EMCCD camera. We  
486 have also seen that the event-based sensor provides access to quantitative information like the ON  
487 time and the number of events of the detected single fluorophores. Importantly, event-based SMLM  
488 opens new avenues for single-molecule applications where classical frame-based cameras are unable  
489 to perform, like we have shown in the case of high-density acquisitions with overlapping PSFs.

490

491 The range of applications of event-based sensing is a priori very broad since it is very well suited  
492 to the extraction of the dynamics of biological processes. In the context of fluorescence microscopy,  
493 it could be especially useful to monitor processes that exhibit a wide range of dynamic scales. An  
494 extreme example would be that of a system that would not evolve for several hours before suddenly  
495 exhibiting dynamics in the millisecond range—such a system would be extremely challenging to  
496 monitor with frame-based approaches due to the necessity to use an exposure time short enough to  
497 sample the motion while keeping realistic data volume and processing times. While that example  
498 may seem purely theoretical, certain phenomena exhibit an extreme range of dynamic scales. One  
499 can cite colloidal glass transition, which is associated to time scales ranging over more than ten or-  
500 ders of magnitude, with large spatial variations of dynamics [45, 46].

501

502 In the framework of SMLM, we found event-based detection to be extremely useful in some cases. A  
503 simple implementation of event-based SMLM readily unlocked resolutions and densities on par with  
504 state-of-the-art scientific camera-based approaches. If one considers that the key to super-resolution  
505 is the control and acquisition of some on/off behaviour of the fluorescent labels, which is a common  
506 view in the community [47], then it appears that event-based sensors are particularly well suited for

507 the purpose of blinking-based imaging of continuous structures since it essentially detects only the  
508 on and off transitions while discarding all the rest of the signal and the associated noise in the pro-  
509 cess. In the same situation, frame-based approaches usually run extra steps aiming at removing static  
510 signal or at extracting dynamic components such as median temporal filtering or blink linking over  
511 several frames to identify the same position detected in several consecutive frames and to merge it  
512 into one localization to improve the quantitativity and maximize the number of photons (in contrast,  
513 event-based SMLM ideally uses exactly one rising and one falling edge per blinking cycle), which  
514 may add complexity and noise or errors. Furthermore, these steps usually fail under challenging  
515 imaging conditions such as when the density of PSFs is high. On the contrary, we demonstrated that  
516 event-based SMLM is largely unaffected under these conditions, which we attribute to both its ability  
517 to extract the useful information only, as well as the possibility to easily perform efficient temporal  
518 resampling at the processing step to reduce the spatio-temporal density of signal to manageable lev-  
519 els.

520  
521 We expect that event-based SMLM could benefit from several improvements, both from the point  
522 of view of the optical design and that of the processing software. Clever strategies could be imple-  
523 mented to adapt the spatio-temporal analysis (i.e. the area of the PSF analysis and the processing time  
524 base) to the local density (in space and time) of the output signal, which is essentially a sparse matrix.  
525 This would probably lead to an increase in calculation speed and localization performance. Other  
526 more specific improvements could be made, like using better suited PSF models for the position cal-  
527 culation such as cubic spline [48] or deep learning-generated bases of experimental PSFs [49, 50, 43].  
528 A noise model for the event-based sensing that would provide an estimation of the CRLB would be  
529 a very useful addition to this.

530  
531 Given the high density imaging capabilities shown in **Fig. 4**, we also hypothesize that event-based  
532 SMLM could be used for quantitative applications in dSTORM since the pumping phase needs not be  
533 discarded, and the molecules blinking during that phase can be effectively counted. In other studies  
534 where the quantitative aspect is not as important as the acquisition speed (such as for live imaging or  
535 for high content screening), it could also benefit dSTORM and PALM experiments by allowing faster  
536 acquisitions—well sampled dSTORM images of dense structures can be obtained in a few minutes  
537 only as demonstrated previously, and PALM experiments could be carried out using higher photoac-  
538 tivation powers without compromising the PSF sparsity criterion. For this purpose, the use of an  
539 image quality assessment method such as [37] could provide useful information about the minimum  
540 acquisition time to obtain the desired image quality.

541  
542 Another very different set of applications where event-based SMLM may excel could be modulated  
543 excitation techniques, where a controlled time-modulated illumination is applied and the fluores-  
544 cence signal is demodulated to extract a parameter of interest. This can be the excitation wavelength  
545 in simultaneous multicolor experiments [51], the lateral position [52, 53], the axial position [5, 54]  
546 or the orientation of the dipole associated with the molecule [55] (non exhaustive list). In all these  
547 cases, however, the temporal aspect is crucial to the performance. While some approaches apply  
548 very low exposure times at the cost of low signal and high sensitivity to intensity fluctuations, others  
549 use pre-demodulated detection paths in combination with fast electrical switching between the chan-  
550 nels, which brings experimental complexity and reduces the effective field of view. We hypothesize  
551 that given their speed event-based sensors should be able to record the temporal modulated output  
552 without inducing much noise or reducing the signal level by splitting the useful photons. Therefore,  
553 event-based sensing could readily capture the dynamics of the response, which could then be effec-  
554 tively analyzed without the need for temporal sampling.

555

## 556 **Acknowledgements**

557 We acknowledge Christian Hubert as well as Tual Monfort and Olivier Thouvenin for their invaluable  
558 help with conceiving the project, as well as for hardware loan. We also thank Margoth Córdova-  
559 Castro, Vittore Scolari, Antoine Coulon, Sandrine Lévêque-Fort and Emmanuel Fort for fruitful dis-  
560 cussions and feedback.

## 561 **Author contributions**

562 C.C. and I.I. conceived the project. C.C. designed the optical setup and performed the acquisitions,  
563 processing and data analysis. C.S. prepared the fixed cells samples and C.C. performed the immuno-  
564 labelling. All authors contributed to writing the manuscript.

## 565 **Competing financial interests**

566 The authors declare no competing interest.

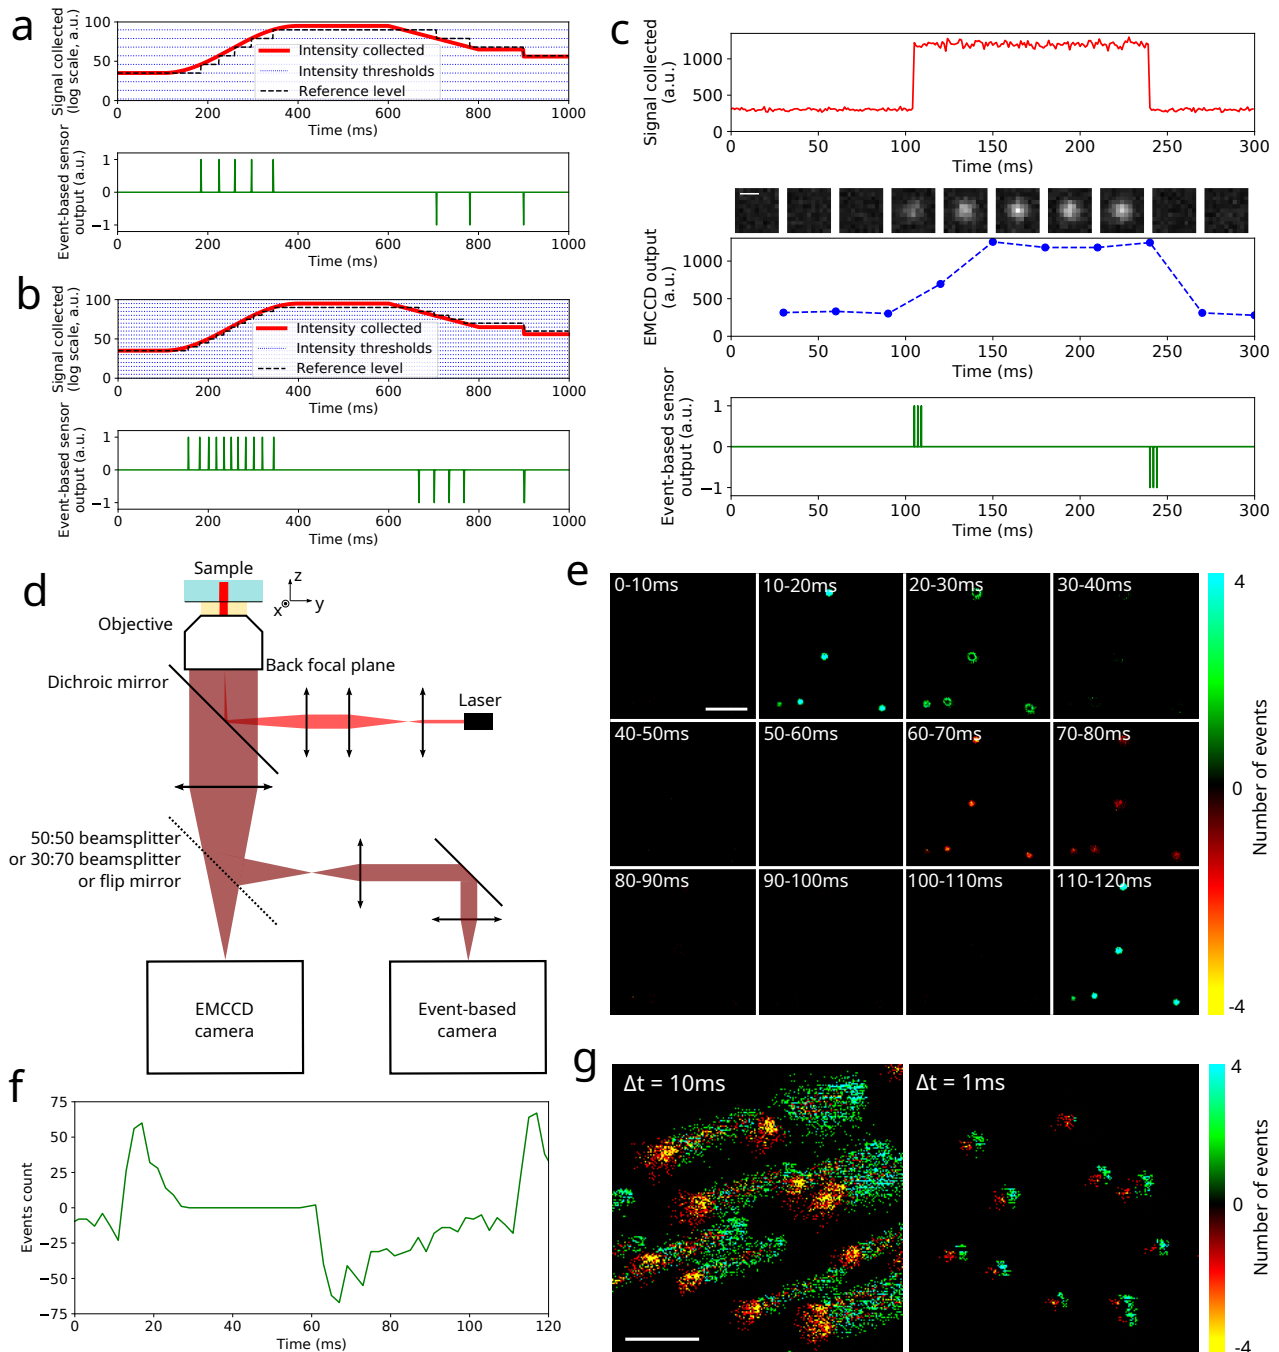

**Figure 1:** Principle of the event-based detection. **a** Description of the working principle of a pixel in an event-based sensor. A given optical intensity signal  $I(t)$  is assumed, the sensitivity threshold  $B$  is set to an arbitrary value. The reference value is also displayed, as well as the response from the pixel. **b** Influence of the sensitivity on the output signal for the same  $I(t)$  as in **a**, but  $B$  is lower (i.e. the detection is more sensitive). As a result of the sensitivity change, the the number of events generated for the same signal is higher. **c** Comparison of the responses produced by a scientific camera and an event-based sensor. The top row shows a theoretical  $I(t)$  profile emitted by a fluorescent molecule turning on and then off, the middle row is the signal acquired by an ideal camera working at a 30 ms exposure time (the corresponding frames are displayed above the graph), and the bottom row displays the signal returned by an event-based sensor with arbitrary sensitivity.

**Figure 1:** **d** Optical setup used for the single-molecule experiments. A laser produces a Gaussian excitation beam. The detection path comprises two detectors: an EMCCD camera and an event-based sensor. We use switchable deflectors to alternate between the two detection paths: we use either a 50:50 beamsplitter, a 30(EMCCD):70(event-based) beamsplitter, a mirror or nothing. More details are available in the **Methods** section. **e** Frames generated from the events acquired in an experiment where 200 nm fluorescent beads on a coverslip are excited with a square pulsed excitation with a period of 100 ms. The frames are generated with a time bin of  $\Delta t = 10$  ms. The color codes the number of events in each pixel, with respect to the polarity of the events detected (positive or negative). The time limits are written for each frame. **f** Event time profile extracted from a single bead from **(e)** with a  $\Delta t = 2$  ms time bin. The number of events represented corresponds to the sum of all the pixels over the PSF. **g** Frames generated at different time bins from an acquisition of 40 nm fluorescent beads deposited on a coverslip while the stage is translated from the bottom left to the top right to simulate molecule motion. From the same event list, frames are generated at  $\Delta t = 10$  ms (left) and  $\Delta t = 1$  ms (right). Scale bars: 0.5  $\mu\text{m}$  (**c**), 5  $\mu\text{m}$  (**e**), 5  $\mu\text{m}$  (**g**).

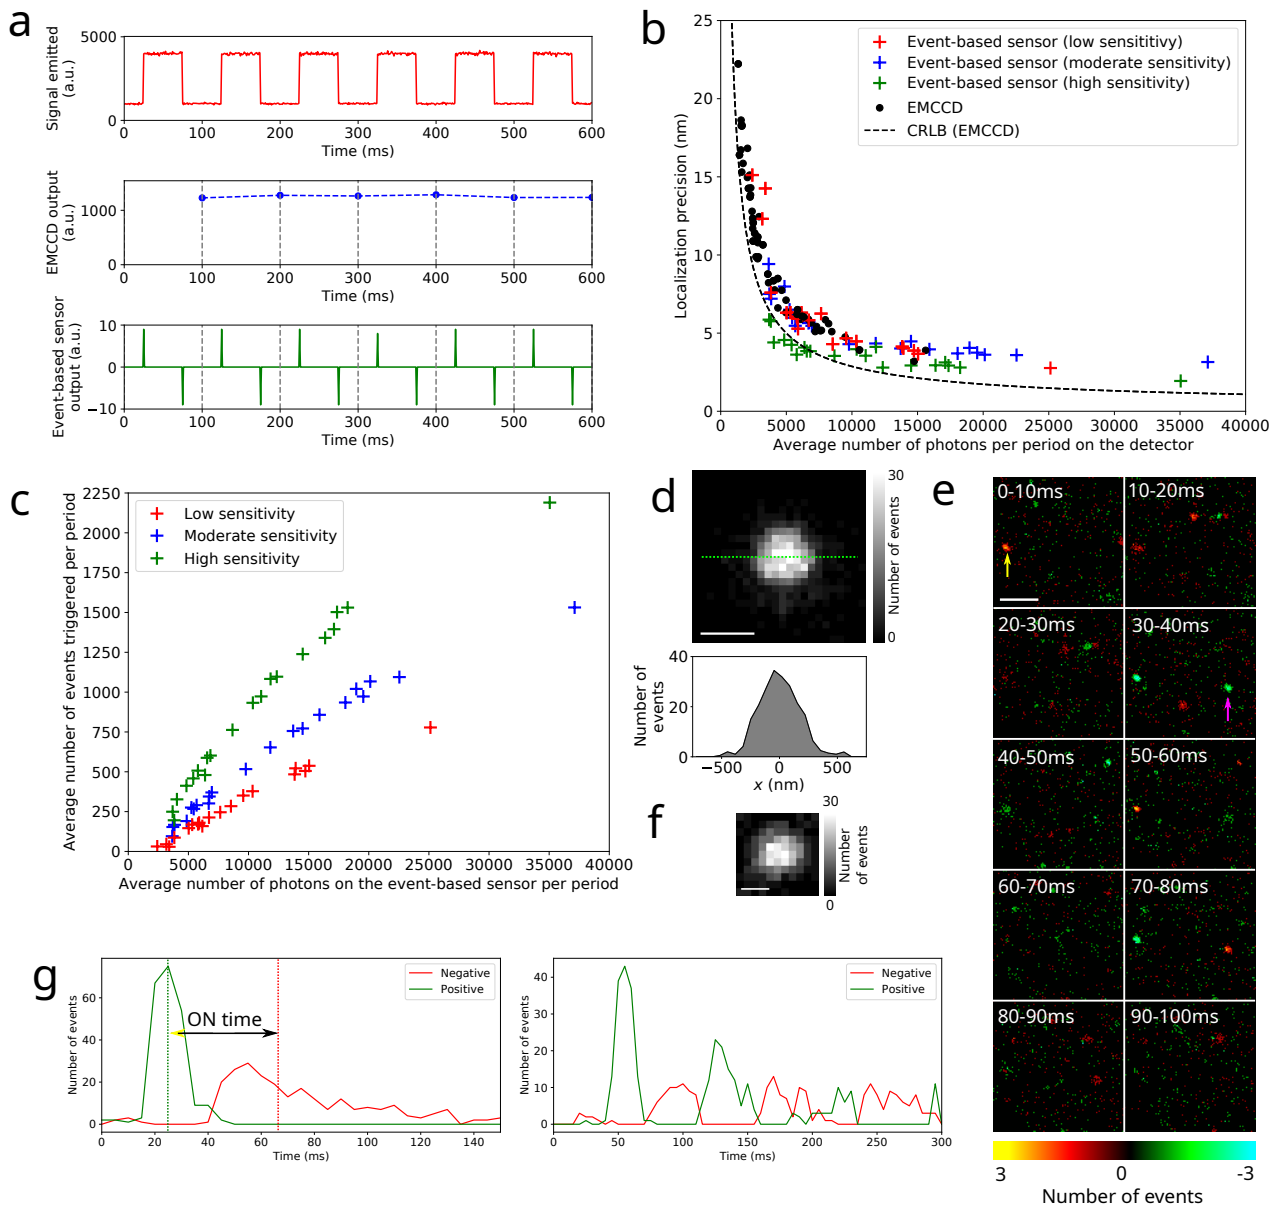

**Figure 2:** Single molecule localization and characterization of the performance. **a** Schematic of the experiment used to measure the localization precision. Fluorescent beads deposited on a coverslip are illuminated with a square modulated laser, therefore  $I(t)$  has a square modulated profile. The EMCCD exposure time is set to exactly one period, so the signal is constant over all the frames (with the exception of the photon noise). The event-based sensor detects the rising and falling edges, and all the events in one period are pooled to compute the center of mass position. **b** Localization precision results displayed as a function of the number of photons incoming on each of the detectors (EMCCD or event-based sensor) per period (calculated from the number of photons detected on the EMCCD taking into account the 30:70 ratio). The results for the event-based sensor are displayed for different levels of sensitivity (i.e. different values of  $B$ ). The CRLB curve corresponding to the EMCCD detection is also shown. **c** Linearity of the response, shown for different levels of sensitivity. The total number of events detected per period is displayed as a function of the number of photons incoming on the event-based sensor per period. Note the quasi-linearity of the response in this signal range. **d** PSF reconstructed by summing the events (regardless of their sign) detected over one period of 100 ms (top) for the same bead. An  $x$  profile along the green dashed line is plotted at the bottom.

**Figure 2:** **e** Frames reconstructed with  $\Delta t = 10$  ms from a sample of AF647 deposited on a glass coverslip excited with a continuous laser in a dSTORM buffer to induce blinking. Note that this data display reveals very different blinking behaviours from one molecule to the other—the molecule indicated with a yellow arrow undergoes multiple blinking events in a quick succession while that indicated by a magenta arrow exhibits a much simpler behaviour with essentially one rising edge and one falling edge. **f** PSF reconstructed from all the events in one AF647 blinking event. The data is taken from the same acquisition as in **e**, and the events are summed regardless of their sign. **g** Two time profiles plotted for different AF647 molecules in the same acquisition as **e**. The one on the left shows a simple blinking profile, which allows the calculation of the ON time, defined as the difference of the mean time of the negative events (moment when the molecule turns off) and the the mean time of the positive events (moment when the molecule turns on). The profile on the right, on the contrary, displays a complex behaviour with multiple blinking events. Scale bars: 500 nm (**d**), 2  $\mu$ m (**e**), 250 nm (**f**).



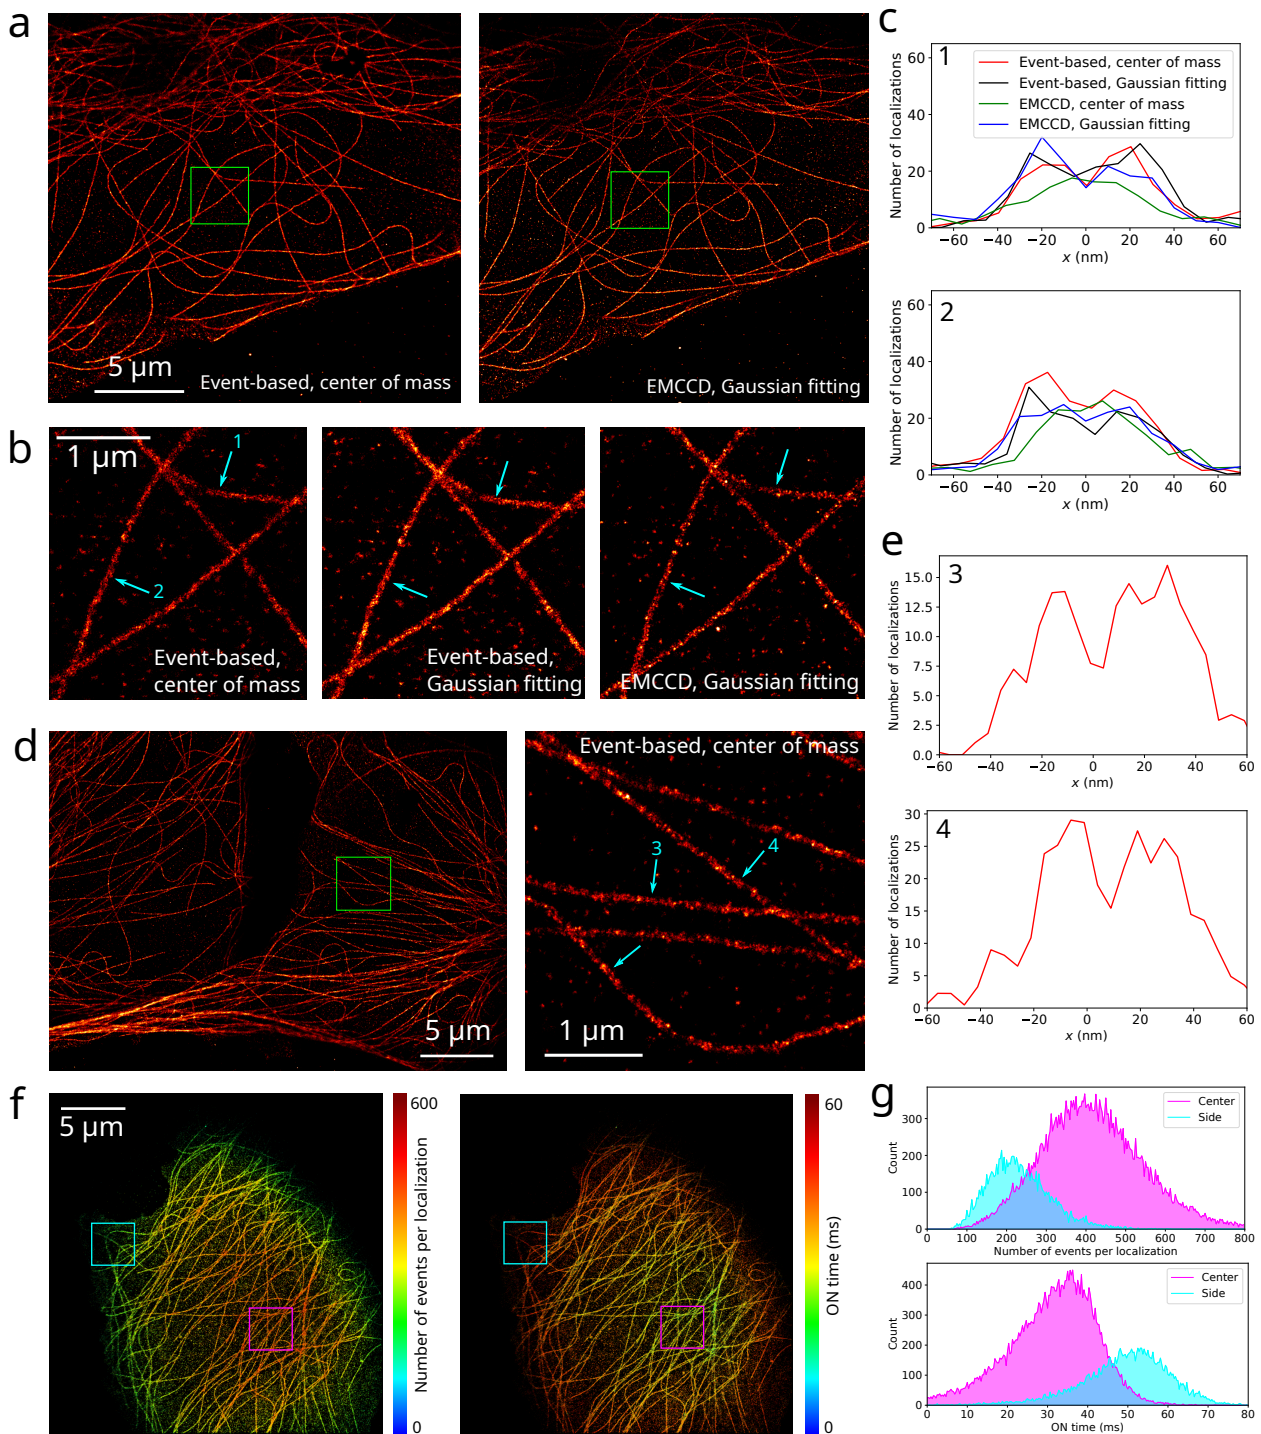

**Figure 3:** Imaging of fixed COS-7 cells labelled with AF647 against  $\alpha$ -tubulin (see the **Methods** section for more information). **a** Simultaneous 2D SMLM image (the density of molecules is color-coded) obtained with the event-based sensor and the EMCCD camera using a 50:50 beamsplitter in the detection path. **b** Zoom on the region of **a** indicated with a green square. We compare the resolution obtained with the event-based sensor (localization performed by center of mass calculation or Gaussian fitting) and with the EMCCD camera (localization performed by Gaussian fitting; center of mass was calculated but is not displayed). **c** Molecule density profiles plotted perpendicular to the microtubules 1 and 2 in **b**. **d** 2D event-based SMLM image obtained with 100 % of the photons incoming on the event-based sensor. A zoom on the region indicated with a green square is also shown. **e** Molecule density profiles plotted perpendicular to the microtubules 3 and 4 in **d**. **f** Maps of the number of events per localization and of the ON time (color-coded values) for a different acquisition. **g** Corresponding histograms displayed for the two regions indicated with cyan and magenta squares. Scale bars: 5  $\mu\text{m}$  (**a**, **d** left, **f**), 1  $\mu\text{m}$  (**b**, **d** right).

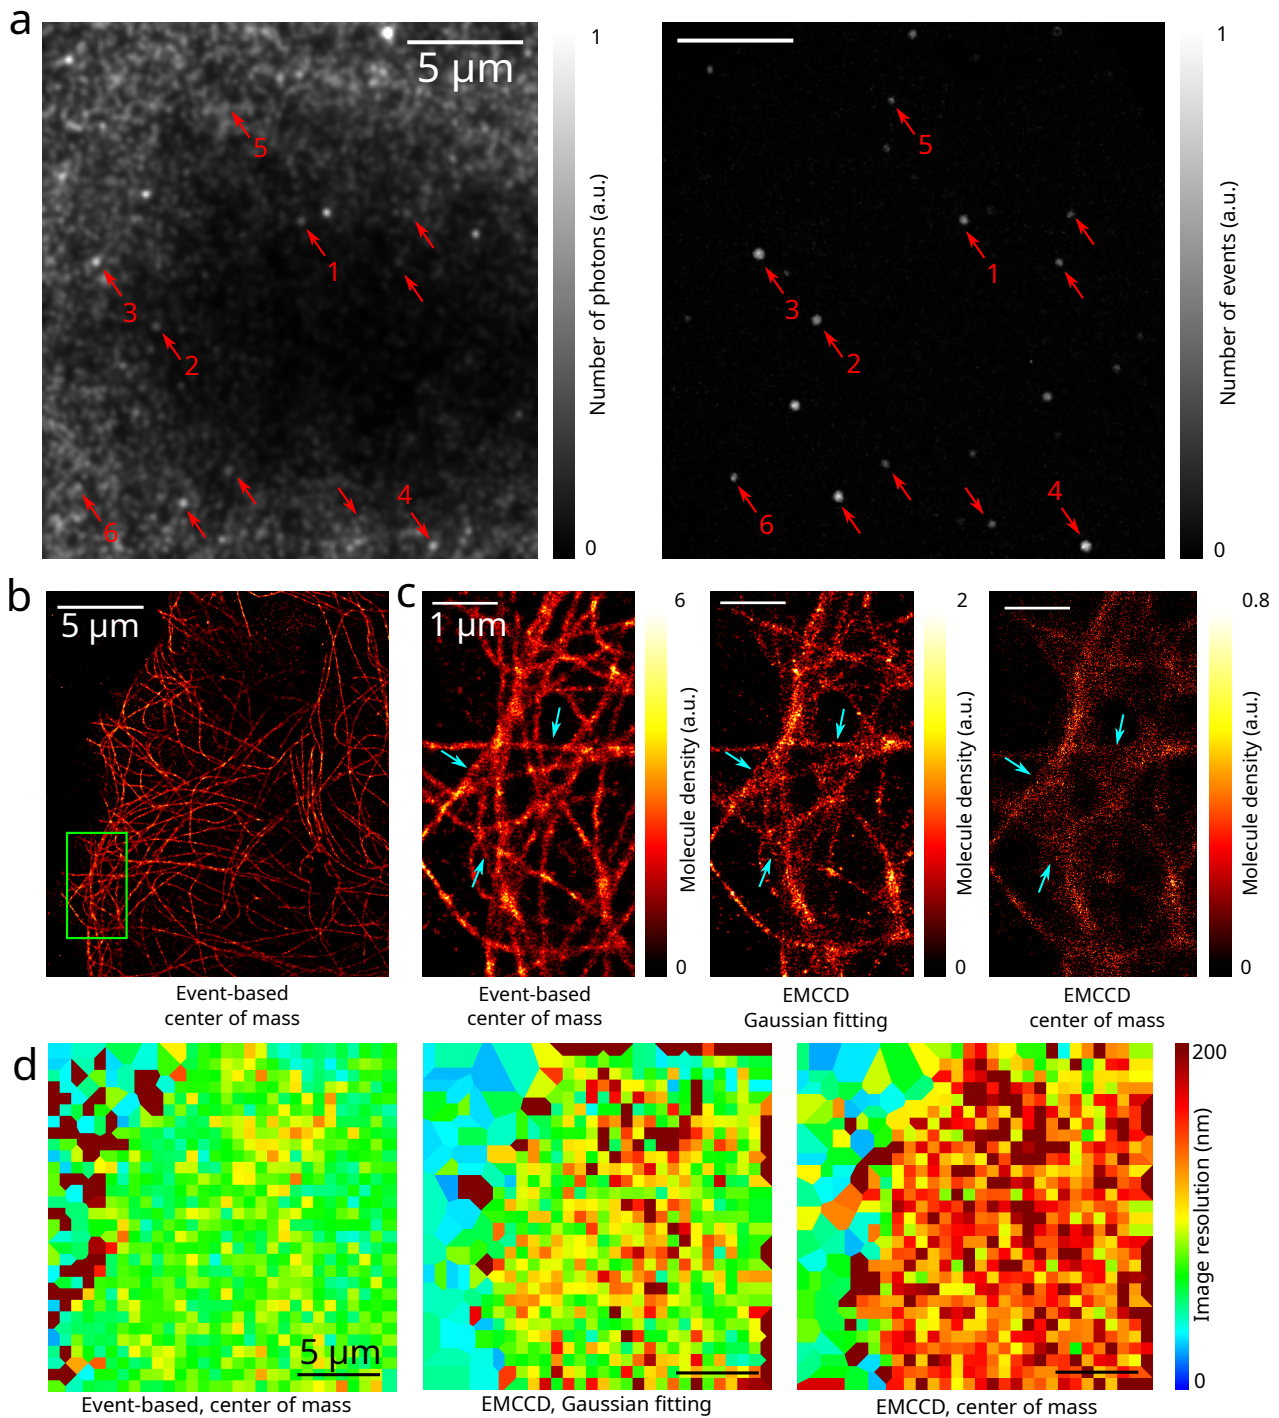

**Figure 4:** High density imaging. **a** Images of dense 488 nm fluorescent beads illuminated with continuous 488 nm excitation and sparse 647 nm beads excited with square modulated 638 nm excitation, using a multiband beamsplitter to collect both wavelength channels, and with a 50:50 beamsplitter between the two sensors. Left: Integrated signal (i.e. sum of all the frames) obtained with the EMCCD camera; right: integrated signal (i.e. sum of all the events) obtained with the event-based sensor. Some of the 647 nm beads are indicated with red arrows. **b** Event-based SMLM image (the density of localizations is color-coded) obtained from the same 250 s long acquisition. **c** Zoom on the area indicated with a green rectangle in **b**, for the same 250 s long acquisition with simultaneous event-based sensor and EMCCD detections. The SMLM images are shown for different localization conditions: from the event-based sensor data with center of mass calculation (left), from the EMCCD data with Gaussian fitting (center), and center of mass calculation (right). Note the different scales of the colorbars.

**Figure 4: d** FRC resolution maps calculated on the area displayed in **b** for the different localization methods tested. Scale bars: 5  $\mu\text{m}$  (**a**, **b**, **d**), 1  $\mu\text{m}$  (**c**).

## 567 **Methods**

568 **Optical setup.** A schematic of the optical setup used is presented in **Fig. 1d**. We used a custom-  
569 built microscope with a RM21 body and a MANNZ micro- and nano-positioner. The illumination  
570 and fluorescence collection was done with a Nikon 100x 1.49NA APO TIRF SR oil immersion. The  
571 excitation was performed thanks to a 638 nm laser (LBX-638-180, 180 mW, Oxixus) and a 488 nm  
572 laser (LBX-488-100, 100 mW, Oxixus) with a 405 nm laser for pumping (LBX-405-50, 50 mW, Oxixus).  
573 A full multiband filter set (LF405/488/561/635-A-000, Semrock) was used. The excitation consisted  
574 of a standard vertical Gaussian beam without any scanning, speckle removal or optical sectioning.  
575 The fluorescence was sent in the detection module and recorded on the EMCCD camera (iXon Ultra  
576 897, Andor) and/or on the event-based sensor (EVK V2 Gen4.1, Prophesee). Both sensors had their  
577 focal planes approximately matched (below 200 nm difference). We used afocal doublets to adjust  
578 the pixel sizes to 107 nm (EMCCD) and 65 nm (event-based sensor) in the object plane. Depending  
579 on the acquisition, we placed different elements in the detection path thanks to a flip platform—  
580 either a 50:50 non-polarizing beamsplitter (Thorlabs), or a 30(EMCCD):70(event-based sensor) non-  
581 polarizing beamsplitter (Thorlabs), or a plane mirror (Thorlabs) to deflect all the signal on the event-  
582 based sensor, or nothing to collect all the fluorescence on the EMCCD camera.

583 **Fluorescent beads sample preparation (Fig. 1g and Fig. 2b–d).** The sample was prepared by diluting  
584 dark red (660/680) 40 nm fluorescent beads (F10720, Thermo Fisher) with a dilution factor of  $10^{-7}$  in  
585 phosphate buffered saline (PBS) and allowing them to deposit on a coverslip.

586 The sample used for **Fig. 1e–f** was prepared by diluting dark red (660/680) 200 nm fluorescent beads  
587 (F8807, Thermo Fisher) with a dilution factor of  $10^{-3}$  in PBS and allowing them to deposit on a  
588 coverslip.

589 The sample used for **Fig. 4a** was prepared by diluting dark red (660/680) 40 nm fluorescent beads  
590 (F10720, Thermo Fisher) with a dilution factor of  $8 \times 10^{-8}$  and yellow-green (505/515) 40 nm fluo-  
591 rescent beads (F10720, Thermo Fisher) with a dilution factor of  $8 \times 10^{-6}$  in PBS and allowing them to  
592 deposit on a coverslip.

593 **Alexa Fluor 647 on a coverslip sample preparation (Fig. 2e–g).** The sample was prepared by de-  
594 positing 1.5  $\mu$ l of the initial solution of AF647 goat anti-mouse antibody (A21237, Thermo Fisher),  
595 allowing 5 minutes for the molecules to deposit before rinsing with H<sub>2</sub>O and adding dSTORM buffer.  
596 The buffer was composed of 100 mg/ml glucose, 3.86 mg/ml MEA, 0.5 mg/ml glucose oxidase and  
597 1.18  $\mu$ l/ml catalase in PBS. The sample was illuminated with a 638 nm continuous excitation at an  
598 irradiance of 5 kW/cm<sup>2</sup>.

599 **Biological samples preparation.** African green monkey kidney cells (COS-7) were cultured at 37°C  
600 and 5 % CO<sub>2</sub> in DMEM medium containing glutamax (Gibco No. 31966-047), 10 % fetal bovine  
601 serum (FBS, Gibco No. A3840401) and 50 U/ml penicillin and 50  $\mu$ l/ml streptomycin (Gibco No.  
602 15140-148). For experiments, cells were plated on 25 mm diameter glass coverslips (type 1.5) placed  
603 in six well plates containing culture medium with 2 % FBS at low density, and fixed on the following  
604 day in 0.1 M sodium phosphate buffer (PB), pH 7.4, containing 4 % paraformaldehyde (PFA), 0.2 %  
605 glutaraldehyde, 1 % sucrose, at 37°C for 10 minutes, followed by three rinses in PBS. Cells were  
606 permeabilized with PBS containing 0.1 % Triton X-100 for 10 minutes and rinsed three times with  
607 PBS prior to immunolabelling.

608 For the labelling, the cells were incubated for 1 hour at 37°C with 1:300 mouse anti- $\alpha$ -tubulin antibody  
609 (Sigma Aldrich, T6199) in PBS + 1 % BSA. This was followed by three washing steps in PBS + 1 % BSA,  
610 incubation for 45 minutes at 37°C with 1:300 goat anti-mouse AF647 antibody (Life Technologies,  
611 A21237) diluted in PBS 1 % BSA and three more washes in PBS. Finally, the cells were post-fixed with  
612 3.6 % formaldehyde for 15 min in PBS. The cells were washed in PBS three times and then reduced  
613 for 10 minutes with 50 mM NH<sub>4</sub>Cl (Sigma Aldrich, 254134), followed by three additional washes in  
614 PBS.

615 **Localization precision and response linearity measurement (Fig. 2b–c).** Acquisitions were per-  
616 formed on fluorescent beads deposited on a coverslip using a square modulated 638 nm excitation

617 with a frequency of 10 Hz, a duty cycle of 0.5 and a minimum laser output of 0 mW. Using a 30:70  
618 (camera:event-based sensor) non-polarizing beamsplitter, acquisitions were captured simultaneously  
619 on the camera (100 ms exposure) and on the event-based sensor with various sensitivity values.  
620 Event-based frames were generated by summing all the events in  $\Delta t = 100$  ms time bins regardless  
621 of their sign. The positions were calculated using a center of mass calculation on both the event-  
622 based reconstructed and the camera-acquired frames. Positions were drift-corrected using a direct  
623 cross-correlation algorithm. A simple clustering algorithm was used to determine the localization  
624 precision from the calculated positions as well as the average number of photons/events for each  
625 bead. A total of 1000 frames were included in the statistics. Finally, a colocalization algorithm was  
626 used to match the camera-based and the event-based bead positions in order to compare the perfor-  
627 mances of both methods. The average number of photons per cycle on the camera was calculated for  
628 each bead from the camera localization results, and this number was subsequently used to calculate  
629 the average number of photons per cycle on the event-based sensor for each bead by applying a ratio  
630 corresponding to the beamsplitter ratio (experimentally measured to be 1:2.38).

631 **Standard density biological experiments (Fig. 3).** EMCCD acquisitions were done with a 30 ms  
632 exposure time and a gain of 100, and event-based was done with thresholds corresponding to the  
633 level of sensitivity called 'high' in the characterization. The detection path used either a 50:50 non-  
634 polarizing beamsplitter cube or a mirror to send all the photons on the event-based sensor. Both  
635 sensors were not synchronized but dual-view acquisitions were started and stopped simultaneously.  
636 We used a dSTORM buffer composed of 100 mg/ml glucose, 3.86 mg/ml MEA, 0.5 mg/ml glucose  
637 oxidase and 1.18  $\mu\text{l/ml}$  catalase in PBS and a 638 nm continuous excitation with an irradiance of  
638 5 kW/cm<sup>2</sup>. After a pumping phase of a few minutes, the acquisitions were started and stopped after  
639 25 minutes. A low power continuous 405 nm excitation was also added during the second half of the  
640 acquisition to increase the density of detections.

641 EMCCD frames were processed using a wavelet algorithm to detect the PSFs and each PSF was  
642 localized on a  $\pm 4$  pixels area centered around the maximum. Positions were estimated using either  
643 Gaussian fitting or center of mass calculation. Drift was corrected using a direct cross-correlation  
644 algorithm using the sample itself as a reference (no fiducial markers were used).

645 Event-based data were processed as follows. Positive events were binned in  $\Delta t = 20$  ms frames, on  
646 which PSFs were detected using a wavelet algorithm. This yielded the rough reference space and  
647 time positions  $x_0$ ,  $y_0$  and  $T_0$  for each PSF. Molecules were then localized from a subset of all the  
648 events (both positive and negative) corresponding to an area of  $\pm 4$  pixels around  $(x_0, y_0)$  and to times  
649 in the interval  $[T_0 - 60 \text{ ms}, T_0 + 120 \text{ ms}]$ . The position of the center was estimated using a center of  
650 mass calculation. Other data were extracted—the total number of events  $N$  in the subset, the time of  
651 the rising edge  $t_+$  (taken as the mean time of the positive events) and the time of the falling edge  $t_-$   
652 (taken as the mean time of the negative events). These were used to calculate the ON time of each  
653 molecule  $t_{ON} = t_- - t_+$ . Positions were drift corrected using the same direct cross-correlation as for  
654 the frame-based data.

655 **High density biological experiments (Fig. 4b–d).** EMCCD acquisitions were done with a 30 ms  
656 exposure time and a gain of 100, and event-based were done with thresholds corresponding to the  
657 level of sensitivity called 'high' in the characterization. The detection path used either a 50:50 non-  
658 polarizing beamsplitter cube or a mirror to send all the photons on the event-based sensor. Both  
659 sensors were not synchronized but dual-view acquisitions were started and stopped simultaneously.  
660 We used a dSTORM buffer composed of 100 mg/ml glucose, 3.86 mg/ml MEA, 0.5 mg/ml glu-  
661 cose oxidase and 1.18  $\mu\text{l/ml}$  catalase in PBS and a 638 nm continuous excitation with an irradiance  
662 of 5 kW/cm<sup>2</sup>. No pumping phase was allowed, so the acquisitions were started immediately and  
663 stopped after 250 seconds. A low power continuous 405 nm excitation was also used during the  
664 entire acquisition to increase the detection density.

665 EMCCD frames were processed using a wavelet algorithm to detect the PSFs and each PSF was  
666 localized on a  $\pm 3$  pixels area centered around the maximum. Positions were estimated using either  
667 Gaussian fitting or center of mass calculation. Drift was corrected using a direct cross-correlation  
668 algorithm using the sample itself as a reference (no fiducial markers were used).

669 Event-based data were processed as follows. The dataset was split in two subsets containing the  
670 positive and negative events respectively. Positive events were binned in  $\Delta t=10$  ms frames, on which  
671 PSFs were detected using a wavelet algorithm. This yielded the rough reference space and time  
672 positions  $x_0$ ,  $y_0$  and  $T_0$  for each PSF. Molecules were then localized from a subset of all the events  
673 (both positive and negative) corresponding to an area of  $\pm 3$  pixels around  $(x_0, y_0)$  and to times in  
674 the interval  $[T_0 - 30 \text{ ms}, T_0 + 30 \text{ ms}]$ . The position of the center was estimated using a center of  
675 mass calculation. The total number of events  $N$  in the subset corresponding to the molecule was also  
676 extracted. The same processing was run on the negative events subset with the same parameters. Due  
677 to the separate processing of the positive and negative events, the ON times could not be extracted  
678 since we did not use a dedicated program to link the rising and falling edges. Positions were drift  
679 corrected using the same direct cross-correlation as for the frame-based data.

680 **FRC resolution calculation** All FRC resolution measurements were done using the Fiji plugin NanoJ-  
681 SQUIRREL [37]. Localization lists were randomly split in two statistically independent sets and  
682 super-resolution images were generated with a pixel size of 5 nm. FRC maps were calculated with a  
683 number of blocks per axis of 30 (for full images) or 10 (for zooms on small sub-regions). We noticed  
684 little variation of the results with the calculation parameters.

685 **Cramér-Rao Lower Bound calculation (Fig. 2b)**. CRLB values were estimated for the EMCCD cam-  
686 era using equation 4 from [56]. The values of the parameters were measured experimentally.

687 **Localization and data treatment software.** The localization and data treatment software is described  
688 in the **Localization precision and response linearity measurement**, **Standard density biological**  
689 **experiments** and **High density biological experiments** Methods sections. It should be noted that no  
690 filtering was used in the event-based processing.

691 All the processing and rendering was performed using a home-written Python code. The function  
692 used to read the event files was borrowed from the Metavision SDK open samples.

693 **Code availability.** Processing codes are made available on Github at the following address:

694 <https://github.com/Clement-Cabriel/Evb-SMLM.git>

695 The repository contains the codes for reading files and converting them into frame stacks, and the  
696 single-molecule localization code will be added soon. More codes will be added in the future.  
697 Datasets are available on the same repository to test the codes.

698 **Data availability.** More datasets are available from the corresponding authors upon reasonable re-  
699 quest.

## 700 References

- 701 [1] E. Betzig, G. H. Patterson, R. Sougrat, O. W. Lindwasser, S. Olenych, J. S. Bonifacino, M. W.  
702 Davidson, J. Lippincott-Schwartz, and H. F. Hess, "Imaging intracellular fluorescent proteins at  
703 nanometer resolution.," *Science (New York, N.Y.)*, vol. 313, pp. 1642–5, sep 2006.
- 704 [2] S. T. Hess, T. P. K. Girirajan, and M. D. Mason, "Ultra-high resolution imaging by fluorescence  
705 photoactivation localization microscopy.," *Biophysical journal*, vol. 91, pp. 4258–72, dec 2006.
- 706 [3] M. J. Rust, M. Bates, and X. Zhuang, "Sub-diffraction-limit imaging by stochastic optical recon-  
707 struction microscopy (STORM)," *Nature Methods*, vol. 3, pp. 793–796, aug 2006.
- 708 [4] F. Balzarotti, Y. Eilers, K. C. Gwosch, A. H. Gynnå, V. Westphal, F. D. Stefani, J. Elf, and S. W. Hell,  
709 "Nanometer resolution imaging and tracking of fluorescent molecules with minimal photon  
710 fluxes," *Science*, vol. 355, pp. 606–612, dec 2016.
- 711 [5] P. Jouchet, C. Cabriel, N. Bourg, M. Bardou, C. Poüs, E. Fort, and S. Lévêque-Fort, "Nanometric  
712 axial localization of single fluorescent molecules with modulated excitation," *Nature Photonics*,  
713 vol. 15, pp. 297–304, jan 2021.

- 714 [6] G. V. Los, L. P. Encell, M. G. McDougall, D. D. Hartzell, N. Karassina, C. Zimprich, M. G. Wood,  
715 R. Learish, R. F. Ohana, M. Urh, D. Simpson, J. Mendez, K. Zimmerman, P. Otto, G. Vidugiris,  
716 J. Zhu, A. Darzins, D. H. Klaubert, R. F. Bulleit, and K. V. Wood, "HaloTag: A novel protein  
717 labeling technology for cell imaging and protein analysis," *ACS Chemical Biology*, vol. 3, no. 6,  
718 pp. 373–382, 2008.
- 719 [7] P. J. Bosch, I. R. Corrêa, M. H. Sonntag, J. Ibach, L. Brunsveld, J. S. Kanger, and V. Subramaniam,  
720 "Evaluation of fluorophores to label SNAP-tag fused proteins for multicolor single-molecule  
721 tracking microscopy in live cells.," *Biophysical Journal*, vol. 107, pp. 803–14, aug 2014.
- 722 [8] M. Mikhaylova, B. M. C. Cloin, K. Finan, R. van den Berg, J. Teeuw, M. M. Kijanka,  
723 M. Sokolowski, E. a. Katrukha, M. Maidorn, F. Opazo, S. Moutel, M. Vantard, F. Perez, P. M. P.  
724 van Bergen en Henegouwen, C. C. Hoogenraad, H. Ewers, and L. C. Kapitein, "Resolving  
725 bundled microtubules using anti-tubulin nanobodies," *Nature Communications*, vol. 6, no. May,  
726 p. 7933, 2015.
- 727 [9] L. D. Lavis, "Teaching old dyes new tricks: Biological probes built from fluoresceins and rho-  
728 damines," *Annual Review of Biochemistry*, vol. 86, pp. 825–843, jun 2017.
- 729 [10] J. B. Grimm, T. A. Brown, B. P. English, T. Lionnet, and L. D. Lavis, "Synthesis of janelia fluor  
730 HaloTag and SNAP-tag ligands and their use in cellular imaging experiments," in *Methods in*  
731 *Molecular Biology*, pp. 179–188, Springer New York, 2017.
- 732 [11] I. Izeddin, J. Boulanger, V. Racine, C. Specht, A. Kechkar, D. Nair, A. Triller, D. Choquet, M. Da-  
733 han, and J. Sibarita, "Wavelet analysis for single molecule localization microscopy," *Optics Ex-*  
734 *press*, vol. 20, p. 2081, jan 2012.
- 735 [12] M. Reisser, J. Hettich, T. Kuhn, A. P. Popp, A. Große-Berkenbusch, and J. C. M. Gebhardt, "Infer-  
736 ring quantity and qualities of superimposed reaction rates from single molecule survival time  
737 distributions," *Scientific Reports*, vol. 10, feb 2020.
- 738 [13] A. Heckert, L. Dahal, R. Tjian, and X. Darzacq, "Recovering mixtures of fast diffusing states  
739 from short single particle trajectories," *Biorxiv*, may 2021.
- 740 [14] M. Lelek, M. T. Gyparaki, G. Beliu, F. Schueder, J. Griffié, S. Manley, R. Jungmann, M. Sauer,  
741 M. Lakadamyali, and C. Zimmer, "Single-molecule localization microscopy," *Nature Reviews*  
742 *Methods Primers*, vol. 1, jun 2021.
- 743 [15] Y.-L. Wu, A. Tschanz, L. Krupnik, and J. Ries, "Quantitative data analysis in single-molecule  
744 localization microscopy," *Trends in Cell Biology*, vol. 30, pp. 837–851, nov 2020.
- 745 [16] B. Huang, W. Wang, M. Bates, and X. Zhuang, "Three-Dimensional Super-Resolution Imaging  
746 by Stochastic Optical Reconstruction Microscopy," *Science*, vol. 319, no. 5864, pp. 810–813, 2008.
- 747 [17] S. R. P. Pavani, M. A. Thompson, J. S. Biteen, S. J. Lord, N. Liu, R. J. Twieg, R. Piestun, and  
748 W. E. Moerner, "Three-dimensional, single-molecule fluorescence imaging beyond the diffrac-  
749 tion limit by using a double-helix point spread function," *Proceedings of the National Academy of*  
750 *Sciences*, vol. 106, pp. 2995–2999, feb 2009.
- 751 [18] N. Bourg, C. Mayet, G. Dupuis, T. Barroca, P. Bon, S. Lécart, E. Fort, and S. Lévêque-Fort, "Direct  
752 optical nanoscopy with axially localized detection," *Nature Photonics*, no. August, 2015.
- 753 [19] C. Cabriel, N. Bourg, P. Jouchet, G. Dupuis, C. Leterrier, A. Baron, M.-A. Badet-Denisot,  
754 B. Vauzeilles, E. Fort, and S. Lévêque-Fort, "Combining 3d single molecule localization strate-  
755 gies for reproducible bioimaging," *Nature Communications*, vol. 10, apr 2019.
- 756 [20] S. A. Maynard, P. Rostaing, N. Schaefer, O. Gemin, A. Candat, A. Dumoulin, C. Villmann,  
757 A. Triller, and C. G. Specht, "Identification of a stereotypic molecular arrangement of endoge-  
758 nous glycine receptors at spinal cord synapses," *eLife*, vol. 10, dec 2021.

- 759 [21] I. M. Khater, I. R. Nabi, and G. Hamarneh, "A review of super-resolution single-molecule local-  
760 ization microscopy cluster analysis and quantification methods," *Patterns*, vol. 1, p. 100038, jun  
761 2020.
- 762 [22] H. Verdier, F. Laurent, A. Cassé, C. L. Vestergaard, C. G. Specht, and J.-B. Masson, "A maximum  
763 mean discrepancy approach reveals subtle changes in  $\alpha$ -synuclein dynamics," *bioRxiv*, apr 2022.
- 764 [23] A. Lampe, V. Haucke, S. J. Sigrist, M. Heilemann, and J. Schmoranzner, "Multi-colour direct  
765 STORM with red emitting carbocyanines," *Biology of the Cell*, vol. 104, no. 4, pp. 229–237, 2012.
- 766 [24] Z. Zhang, S. J. Kenny, M. Hauser, W. Li, and K. Xu, "Ultrahigh-throughput single-molecule  
767 spectroscopy and spectrally resolved super-resolution microscopy," *Nature Methods*, no. august,  
768 2015.
- 769 [25] C. A. Valades Cruz, H. A. Shaban, A. Kress, N. Bertaux, S. Monneret, M. Mavrakis, J. Sa-  
770 vatier, and S. Brasselet, "Quantitative nanoscale imaging of orientational order in biological  
771 filaments by polarized superresolution microscopy," *Proceedings of the National Academy of Sci-  
772 ences*, p. 201516811, 2016.
- 773 [26] A. Kinkhabwala, Z. Yu, S. Fan, Y. Avlasevich, K. MÅ½llen, and W. E. Moerner, "Large single-  
774 molecule fluorescence enhancements produced by a bowtie nanoantenna," *Nature Photonics*,  
775 vol. 3, pp. 654–657, oct 2009.
- 776 [27] E. Lerner, T. Cordes, A. Ingargiola, Y. Alhadid, S. Chung, X. Michalet, and S. Weiss, "Toward dy-  
777 namic structural biology: Two decades of single-molecule fÅ¼rster resonance energy transfer,"  
778 *Science*, vol. 359, jan 2018.
- 779 [28] D. Bouchet, J. Scholler, G. Blanquer, Y. D. Wilde, I. Izeddin, and V. Krachmalnicoff, "Probing  
780 near-field light–matter interactions with single-molecule lifetime imaging," *Optica*, vol. 6, p. 135,  
781 jan 2019.
- 782 [29] G. Blanquer, B. van Dam, A. Gulinatti, G. Acconcia, Y. D. Wilde, I. Izeddin, and V. Krachmal-  
783 nicoff, "Relocating single molecules in super-resolved fluorescence lifetime images near a plas-  
784 monic nanostructure," *ACS Photonics*, vol. 7, pp. 393–400, jan 2020.
- 785 [30] A. F. Koenderink, R. Tsukanov, J. Enderlein, I. Izeddin, and V. Krachmalnicoff, "Super-resolution  
786 imaging: when biophysics meets nanophotonics," *Nanophotonics*, vol. 11, pp. 169–202, dec 2021.
- 787 [31] N. Oleksiievets, Y. Sargsyan, J. C. Thiele, N. Mougios, S. Sograte-Idrissi, O. Nevskiy, I. Greg-  
788 or, F. Opazo, S. Thoms, J. Enderlein, and R. Tsukanov, "Fluorescence lifetime DNA-PAINT for  
789 multiplexed super-resolution imaging of cells," *Communications Biology*, vol. 5, jan 2022.
- 790 [32] A. Beghin, A. Kechkar, C. Butler, F. Levet, M. Cabillic, O. Rossier, G. Giannone, R. Galland,  
791 D. Choquet, and J.-B. Sibarita, "Localization-based super-resolution imaging meets high-content  
792 screening," *Nature Methods*, vol. 14, pp. 1184–1190, oct 2017.
- 793 [33] D. Mahecic, W. L. Stepp, C. Zhang, J. Griffié, M. Weigert, and S. Manley, "Event-driven acquisi-  
794 tion for content-enriched microscopy," *bioRxiv*, 2022.
- 795 [34] F. Liao, F. Zhou, and Y. Chai, "Neuromorphic vision sensors: Principle, progress and perspec-  
796 tives," *Journal of Semiconductors*, vol. 42, p. 013105, jan 2021.
- 797 [35] "Prophesee gen4.1 product brief: [https://support.prophesee.ai/portal/en/kb/articles/evk4-  
798 hd-product-brief.](https://support.prophesee.ai/portal/en/kb/articles/evk4-hd-product-brief)"
- 799 [36] B. Nieuwenhuizen, Robert P. J.;Lidke, Keith; Bates, Mark; Stallinga, Sjoerd; Rieger, "Image Res-  
800 olution in Optical Nanoscopy," *Nature Methods*, vol. 6, no. 10, pp. 1199–1216, 2013.



- 801 [37] S. Culley, D. Albrecht, C. Jacobs, P. M. Pereira, C. Leterrier, J. Mercer, and R. Henriques, "Quantitative mapping and minimization of super-resolution optical imaging artifacts," *Nature Methods*,  
802 vol. 15, pp. 263–266, feb 2018.  
803
- 804 [38] O. K. Wade, J. B. Woehrstein, P. C. Nickels, S. Strauss, F. Stehr, J. Stein, F. Schueder, M. T.  
805 Strauss, M. Ganji, J. Schnitzbauer, H. Grabmayr, P. Yin, P. Schwille, and R. Jungmann, "124-color  
806 super-resolution imaging by engineering DNA-PAINT blinking kinetics," *Nano Letters*, vol. 19,  
807 pp. 2641–2646, mar 2019.
- 808 [39] J. E. Donehue, E. Wertz, C. N. Talicska, and J. S. Biteen, "Plasmon-enhanced brightness and  
809 photostability from single fluorescent proteins coupled to gold nanorods," *The Journal of Physical  
810 Chemistry C*, vol. 118, pp. 15027–15035, jun 2014.
- 811 [40] T. Dertinger, R. Colyer, G. Iyer, S. Weiss, and J. Enderlein, "Fast, background-free, 3d super-  
812 resolution optical fluctuation imaging (SOFI)," *Proceedings of the National Academy of Sciences*,  
813 vol. 106, pp. 22287–22292, dec 2009.
- 814 [41] S. Geissbuehler, C. Dellagiacomma, and T. Lasser, "Comparison between SOFI and STORM,"  
815 *Biomedical Optics Express*, vol. 2, p. 408, jan 2011.
- 816 [42] S. Hugelier, J. J. de Rooi, R. Bernex, S. Duwé, O. Devos, M. Sliwa, P. Dedecker, P. H. C. Eilers,  
817 and C. Ruckebusch, "Sparse deconvolution of high-density super-resolution images," *Scientific  
818 Reports*, vol. 6, feb 2016.
- 819 [43] A. Speiser, L.-R. Müller, P. Hoess, U. Matti, C. J. Obara, W. R. Legant, A. Kreshuk, J. H. Macke,  
820 J. Ries, and S. C. Turaga, "Deep learning enables fast and dense single-molecule localization  
821 with high accuracy," *Nature Methods*, vol. 18, pp. 1082–1090, sep 2021.
- 822 [44] A. Aristov, B. Lelandais, E. Rensen, and C. Zimmer, "ZOLA-3d allows flexible 3d localization  
823 microscopy over an adjustable axial range," *Nature Communications*, vol. 9, jun 2018.
- 824 [45] E. R. Weeks, "Introduction to the colloidal glass transition," *ACS Macro Letters*, vol. 6, pp. 27–34,  
825 dec 2016.
- 826 [46] C. R. Nugent, K. V. Edmond, H. N. Patel, and E. R. Weeks, "Colloidal glass transition observed  
827 in confinement," *Physical Review Letters*, vol. 99, p. 025702, jul 2007.
- 828 [47] S. W. Hell, "Far-field optical nanoscopy," *Science*, vol. 316, pp. 1153–1158, may 2007.
- 829 [48] H. P. Babcock and X. Zhuang, "Analyzing single molecule localization microscopy data using  
830 cubic splines," *Scientific Reports*, vol. 7, apr 2017.
- 831 [49] E. Nehme, D. Freedman, R. Gordon, B. Ferdman, L. E. Weiss, O. Alalouf, T. Naor, R. Orange,  
832 T. Michaeli, and Y. Shechtman, "DeepSTORM3d: dense 3d localization microscopy and PSF  
833 design by deep learning," *Nature Methods*, vol. 17, pp. 734–740, jun 2020.
- 834 [50] N. Boyd, E. Jonas, H. Babcock, and B. Recht, "Deeploco: Fast 3d localization microscopy using  
835 neural networks," *bioRxiv*, 2018.
- 836 [51] P. A. Gómez-García, E. T. Garbacik, J. J. Otterstrom, M. F. Garcia-Parajo, and M. Lakadamyali,  
837 "Excitation-multiplexed multicolor superresolution imaging with fm-STORM and fm-DNA-  
838 PAINT," *Proceedings of the National Academy of Sciences*, vol. 115, pp. 12991–12996, dec 2018.
- 839 [52] L. Gu, Y. Li, S. Zhang, Y. Xue, W. Li, D. Li, T. Xu, and W. Ji, "Molecular resolution imaging by  
840 repetitive optical selective exposure," *Nature Methods*, vol. 16, pp. 1114–1118, sep 2019.
- 841 [53] J. Cnossen, T. Hinsdale, R. Ø. Thorsen, M. Siemons, F. Schueder, R. Jungmann, C. S. Smith,  
842 B. Rieger, and S. Stallinga, "Localization microscopy at doubled precision with patterned illu-  
843 mination," *Nature Methods*, vol. 17, pp. 59–63, dec 2019.

- 844 [54] L. Gu, Y. Li, S. Zhang, M. Zhou, Y. Xue, W. Li, T. Xu, and W. Ji, "Molecular-scale axial localization  
845 by repetitive optical selective exposure," *Nature Methods*, vol. 18, pp. 369–373, apr 2021.
- 846 [55] R. Ø. Thorsen, C. N. Hulleman, B. Rieger, and S. Stallinga, "Photon efficient orientation esti-  
847 mation using polarization modulation in single-molecule localization microscopy," *Biomedical*  
848 *Optics Express*, vol. 13, p. 2835, apr 2022.
- 849 [56] S. Stallinga and B. Rieger, "The effect of background on localization uncertainty in single emitter  
850 imaging," in *2012 9th IEEE International Symposium on Biomedical Imaging (ISBI)*, pp. 988–991,  
851 IEEE, may 2012.

852

## Supplementary material

853

### Single molecule localization microscopy using event-based vision sensors allows imaging of dense molecules

854

855

Clément Cabriel\*, Christian G. Specht and Ignacio Izeddin\*\*

856

\*Corresponding author: [clement.cabriel@espci.fr](mailto:clement.cabriel@espci.fr), [cabriel.clement@gmail.com](mailto:cabriel.clement@gmail.com)

857

\*\*Corresponding author: [ignacio.izeddin@espci.fr](mailto:ignacio.izeddin@espci.fr)

858

July 22, 2022

859 **Supplementary Figure 1:** FRC resolution measurements on the acquisitions presented in **Fig. 3**.

860 **Supplementary Figure 2:** Frames extracted from the acquisition presented in **Fig. 4**.

861 **Supplementary Table 1:** FRC resolution measurements on all the biological samples presented.

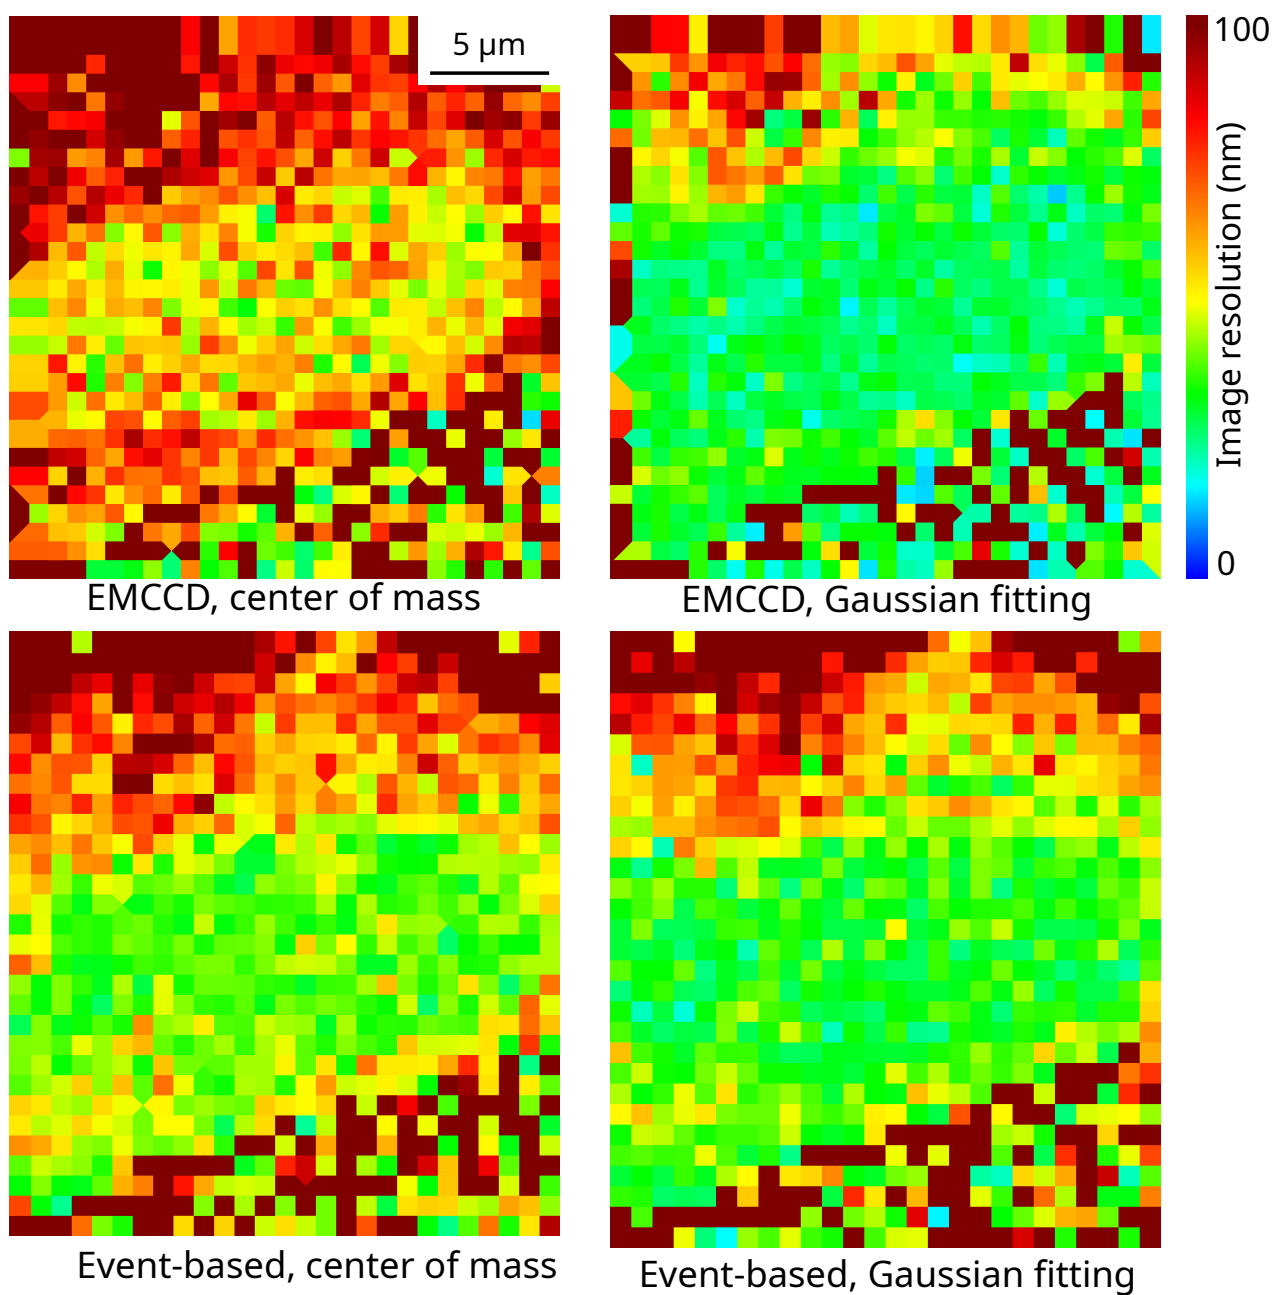

**Supplementary Figure 1:** FRC resolution measurements on fixed COS-7 cells labelled with AF647 against  $\alpha$ -tubulin obtained with the event-based sensor and the EMCCD camera using a 50:50 beam-splitter in the detection path (corresponding to the data displayed in Fig. 3).

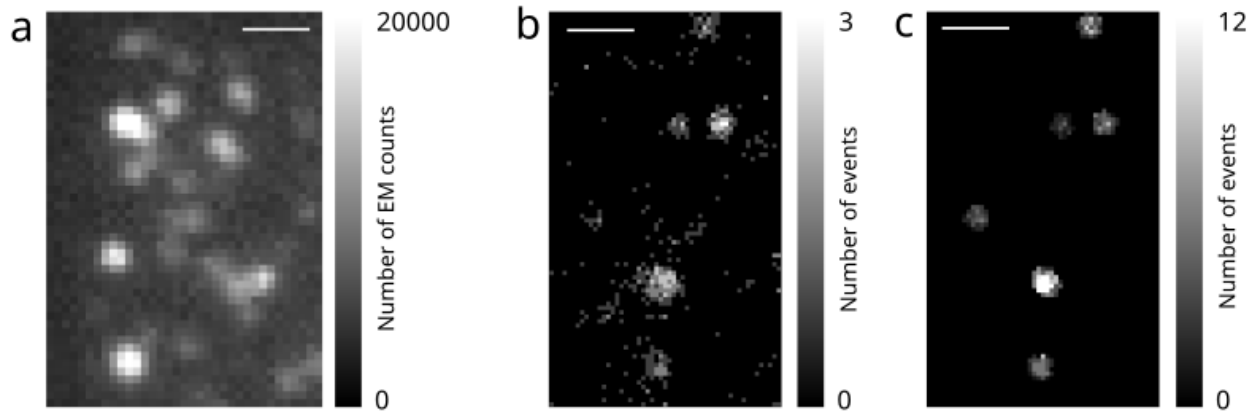

**Supplementary Figure 2:** Frames extracted from an acquisition on fixed COS-7 cells labelled with AF647 against  $\alpha$ -tubulin acquired with a 50:50 beamsplitter over 250 seconds in a dense regime where the PSF exhibit noticeable overlap (presented in Fig. 4). **a** Single 30 ms exposure frame taken from the EMCCD. **b** Single frame (corresponding to a slightly different instant in the acquisition as **a**) generated from all the positive events detected in  $\Delta t = 10$  ms (this frame is used only for the PSF detection). **c** Frame generated from all the positive events used for the localization of the PSFs detected in the  $\Delta t = 10$  ms frame, i.e. in a time window of  $[-30$  ms,  $30$  ms] around the mean time of each molecule. Note the difference of event number compared to **b**. Scale bars:  $1 \mu\text{m}$ .

| Acquisition conditions                                        | Corresponding figure | Sensor and localization method | Average resolution (nm) |
|---------------------------------------------------------------|----------------------|--------------------------------|-------------------------|
| Standard density, full field, 50:50 beamsplitter              | <b>Fig. 3a</b>       | Event-based, center of mass    | 36                      |
|                                                               |                      | Event-based, Gaussian fitting  | 30                      |
|                                                               |                      | EMCCD, center of mass          | 50                      |
|                                                               |                      | EMCCD, Gaussian fitting        | 28                      |
| Standard density, zoom, 50:50 beamsplitter                    | <b>Fig. 3b</b>       | Event-based, center of mass    | 34                      |
|                                                               |                      | Event-based, Gaussian fitting  | 28                      |
|                                                               |                      | EMCCD, center of mass          | 27                      |
|                                                               |                      | EMCCD, Gaussian fitting        | 44                      |
| Standard density, full field, 100 % on the event-based sensor | <b>Fig. 3d left</b>  | Event-based, center of mass    | 28                      |
|                                                               |                      | Event-based, Gaussian fitting  | 24                      |
| Standard density, zoom, 100 % on the event-based sensor       | <b>Fig. 3d right</b> | Event-based, center of mass    | 28                      |
|                                                               |                      | Event-based, Gaussian fitting  | 23                      |
| High density, full field, 50:50 beamsplitter                  | <b>Fig. 4d</b>       | Event-based, center of mass    | 64                      |
|                                                               |                      | Event-based, Gaussian fitting  | 64                      |
|                                                               |                      | EMCCD, center of mass          | 136                     |
|                                                               |                      | EMCCD, Gaussian fitting        | 92                      |
| Standard density, zoom, 50:50 beamsplitter                    | <b>Fig. 4c</b>       | Event-based, center of mass    | 57                      |
|                                                               |                      | Event-based, Gaussian fitting  | 55                      |
|                                                               |                      | EMCCD, center of mass          | 114                     |
|                                                               |                      | EMCCD, Gaussian fitting        | 84                      |

**Supplementary Table 1:** FRC resolution measurements on fixed COS-7 cells labelled with AF647 against  $\alpha$ -tubulin under various acquisition conditions.
